1           **Does diversity beget diversity in microbiomes?**

2

3

4

5                           **Authors:** Naïma Madi<sup>1</sup>, Michiel Vos<sup>2</sup>, Carmen Lia Murall<sup>1</sup>,

6                                           Pierre Legendre<sup>1</sup> and B. Jesse Shapiro<sup>1,3,4\*</sup>

7

8           1. Département de sciences biologiques, Université de Montréal, Canada

9           2. European Centre for Environment and Human Health, University of Exeter,

10                   Penryn, UK

11           3. Department of Microbiology and Immunology, McGill University, Canada

12           4. McGill Genome Centre, McGill University, Canada

13

14                   \*correspondence: [jesse.shapiro@mcgill.ca](mailto:jesse.shapiro@mcgill.ca)

15

16   **keywords:** microbiome, evolution, ecology, Earth Microbiome Project, 16S rRNA

17

18 **Abstract**

19 Microbes are embedded in complex communities where they engage in a wide array of  
20 intra- and inter-specific interactions. The extent to which these interactions drive or  
21 impede microbiome diversity is not well understood. Historically, two contrasting  
22 hypotheses have been suggested to explain how species interactions could influence  
23 diversity. ‘Ecological Controls’ (EC) predicts a negative relationship, where the evolution  
24 or migration of novel types is constrained as niches become filled. In contrast, ‘Diversity  
25 Begets Diversity’ (DBD) predicts a positive relationship, with existing diversity  
26 promoting the accumulation of further diversity via niche construction and other  
27 interactions. Using high-throughput amplicon sequencing data from the Earth  
28 Microbiome Project, we provide evidence that DBD is strongest in low-diversity biomes,  
29 but weaker in more diverse biomes, consistent with biotic interactions initially favoring  
30 the accumulation of diversity (as predicted by DBD). However, as niches become  
31 increasingly filled, diversity hits a plateau (as predicted by EC).

32

33

34 **Impact statement:**

35 Microbiome diversity favors further diversity in a positive feedback that is strongest in  
36 lower-diversity biomes (*e.g.* guts) but which plateaus as niches are increasingly filled in  
37 higher-diversity biomes (*e.g.* soils).

## 38 **Introduction**

39           The majority of the genetic diversity on Earth is encoded by microbes (Hug et al.,  
40 2016; Lapierre & Gogarten, 2009; Sunagawa et al., 2015) and the functioning of all  
41 Earth's ecosystems is reliant on diverse microbial communities (Falkowski et al., 2008).  
42 High-throughput 16S rRNA gene amplicon sequencing studies continue to yield  
43 unprecedented insight into the taxonomic richness of microbiomes (e.g. (Louca et al.,  
44 2019; Sogin et al., 2006)), and abiotic drivers of community composition (e.g. pH;  
45 Lauber et al., 2009; Power et al., 2018) are increasingly characterized. Although it is  
46 known that biotic (microbe-microbe) interactions can also be important in determining  
47 community composition (Needham & Fuhrman, 2016), comparatively little is known  
48 about how such interactions, either positive (e.g. cross-feeding; Seth & Taga, 2014) or  
49 negative (e.g. toxin-mediated interference competition; Czárán et al., 2002; Hibbing et  
50 al., 2010), shape microbiome diversity as a whole.

51           The dearth of studies exploring how microbial interactions could influence  
52 diversity stands in marked contrast to a long research tradition on biotic controls of plant  
53 and animal diversity (Elton, 1946; Gause, 2003). In an early study of 49 animal  
54 (vertebrate and invertebrate) community samples, Elton plotted the number of species  
55 versus the number of genera and observed a ~1:1 ratio in each individual sample, but a  
56 ~4:1 ratio when all samples were pooled (Elton, 1946). He took this observation as  
57 evidence for competitive exclusion preventing related species, more likely to overlap in  
58 niche space, to co-exist. This concept, more recently referred to as niche filling or  
59 Ecological Controls (EC) (Schluter & Pennell, 2017), predicts speciation (or, more  
60 generally, diversification) rates to decrease with increasing standing species diversity

61 because less niche space is available (Rabosky & Hurlbert, 2015). In contrast, the  
62 Diversity Begets Diversity (DBD) model predicts that when species interactions create  
63 novel niches, standing biodiversity favors further diversification (Calcagno et al., 2017;  
64 Whittaker, 1972). For example, niche construction (i.e. the physical, chemical or  
65 biological alteration of the environment) could influence the evolution of the species  
66 constructing the niche, as well as that of co-occurring species (Laland et al., 1999; San  
67 Roman & Wagner, 2018). An alternative to either EC or DBD is The Neutral Theory of  
68 Biodiversity and Biogeography, in which all species are functionally equivalent and  
69 communities assemble via random sampling (Hubbell, 2001). Neutral Theory serves as a  
70 null hypothesis of community assembly in macrobes (Azaele et al., 2016; N. J. Gotelli &  
71 McGill, 2006), and more recently in microbiome research (Harris et al., 2017; Li & Ma,  
72 2016).

73 Empirical evidence for the action of EC vs. DBD in natural plant and animal  
74 communities has been mixed (Calcagno et al., 2017; Emerson & Kolm, 2005; Palmer &  
75 Maurer, 1997; Price et al., 2014; Rabosky et al., 2018). Laboratory evolution experiments  
76 tracking the diversification of a focal bacterial lineage in communities of varying  
77 complexity have also yielded contradictory results, with support for EC, DBD, or  
78 intermediate scenarios (Brockhurst et al., 2007; Meyer & Kassen, 2007). For example,  
79 diversification of a focal *Pseudomonas* clone was favored by increasing community  
80 diversity in the range of 0-20 other strains or species within the same genus (Calcagno et  
81 al., 2017; Jousset et al., 2016) but diversification was inhibited in highly diverse  
82 communities (e.g. hundreds or thousands of species in compost; (Gómez & Buckling,

83 2013)). These experiments are consistent with interspecific competition initially driving  
84 (Bailey et al., 2013), but eventually inhibiting diversification as niches are filled.

85 Most laboratory experiments are restricted to relatively short evolutionary time  
86 scales and include only a small number of taxa; it is therefore unclear if they can be  
87 generalized to natural communities consisting of many more taxa evolving and  
88 assembling over much longer periods, spanning more environmental change, greater  
89 evolutionary diversification, and frequent migration events. Although the absence of a  
90 substantial prokaryotic fossil record hinders deconvoluting speciation and extinction rates  
91 (Louca & Pennell, 2020; Marshall, 2017), Louca et al. (Louca et al., 2018) recently  
92 estimated that bacterial diversity has mostly increased over the past billion years, with  
93 speciation rates slightly exceeding extinction rates. However, because many free-living  
94 microbes have high migration rates (“everything is everywhere, but the environment  
95 selects” (de Wit & Bouvier, 2006)), we expect that the majority of diversity present  
96 within a typical microbiome sample is selected from a pool of migrants rather than  
97 having evolved *in situ*. As such, here we broadly define “diversity begets diversity”  
98 (DBD) to include the combined effects of community assembly from a migrant pool  
99 (‘ecological species sorting’) and *in situ* evolutionary diversification (**Fig. 1**).

100

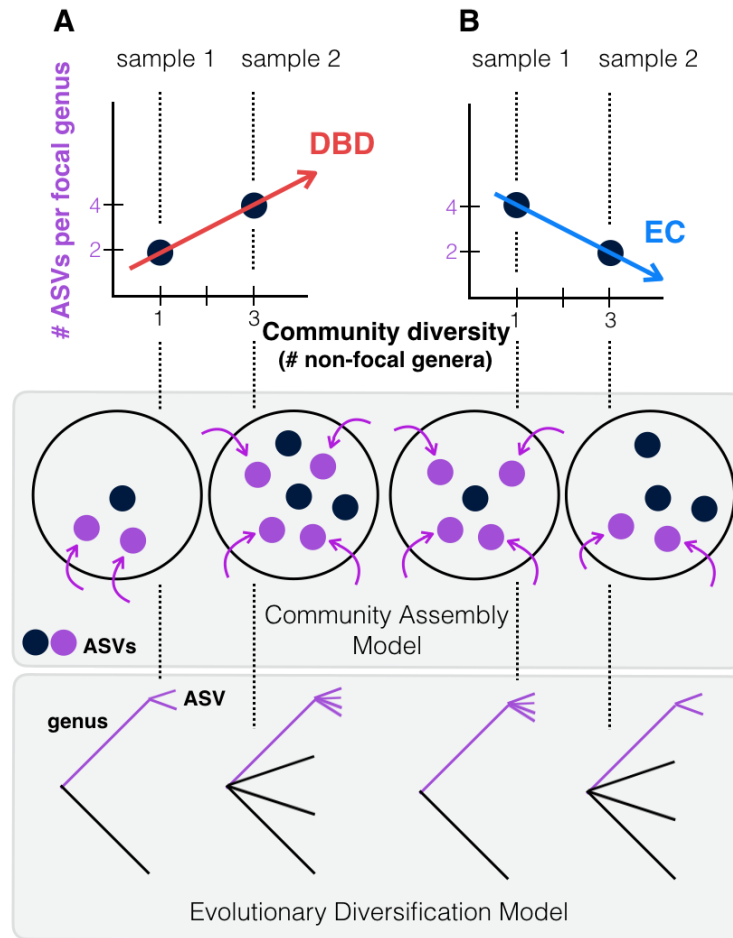

101

102 **Fig. 1. Contrasting the Diversity Begets Diversity (DBD) and Ecological Controls**

103 **(EC) models. (A)** In this hypothetical scenario, microbiome sample 1 contains one non-  
104 focal genus, and two amplicon sequence variants (ASVs) within the focal genus (point at  
105  $x=1, y=2$  in the plot). Sample 2 contains three non-focal genera, and four ASVs within  
106 the focal genus (point at  $x=3, y=4$ ). Tracing a line through these points yields a positive  
107 diversity slope, supporting the DBD model (red). **(B)** Alternatively, a negative slope  
108 would support the Ecological Controls (EC) model (blue line). In the middle panel, we  
109 consider a community assembly model to explain the hypothetical data of the top panel,  
110 in which standing diversity (black points) in a community selects (for or against) new  
111 types (referred to here as ASVs) which arrive via migration (purple points & arrows). In  
112 the bottom panel, we consider an evolutionary diversification model of a focal lineage  
113 (genus) into ASVs as a function of initial genus-level community diversity present at the  
114 time of diversification.

115           To test whether patterns of diversity in natural communities conform to EC or  
116 DBD dynamics, we used 2,000 microbiome samples from the Earth Microbiome Project  
117 (EMP), the largest available repository of biodiversity based on standardized sampling  
118 and sequencing protocols, with 16S rRNA gene amplicon sequence variants (ASVs) as  
119 the finest-grained taxonomic unit (Thompson et al., 2017). Following Elton (Elton,  
120 1946), we use the equivalent of Species:Genus ratios, calculating a range of taxonomic  
121 diversity ratios (up to the Class:Phylum level) as proxies for diversity within a focal  
122 taxon, from shallow to deep evolutionary time. We then plot each ratio as a function of  
123 the number of non-focal taxa (Genera, Families, Orders, Classes, and Phyla, respectively)  
124 with which the focal taxon could interact. We refer to the slope of these plots as the  
125 “diversity slope”, with negative slopes supporting EC and positive slopes supporting  
126 DBD (**Fig. 1**). As a null, we compare these slopes to the expectation under Neutral  
127 Theory. To avoid a trivially positive diversity slope due to variation in sequencing effort,  
128 all samples were rarefied to 5,000 observations (counts of 16S rRNA gene sequences), as  
129 diversity estimates are highly sensitive to sampling effort (Nicholas J. Gotelli & Colwell,  
130 2001). As 16S evolves at a rate of roughly 1-2 substitutions per million years (Kuo &  
131 Ochman, 2009b), evolutionary diversification within individual EMP samples cannot be  
132 uncovered using this marker; rather our data represent mainly a record of community  
133 assembly.

134

135

136 **Results**

137

138 **Quantifying the DBD-EC continuum in prokaryote communities compared to**  
139 **neutral null models.** We used generalized linear mixed models (GLMMs) to estimate the  
140 diversity slope at each taxonomic level in the EMP data, which revealed a tendency  
141 toward positive slopes with significant variation explained by the random effects of  
142 lineage, environment, and their interaction (**Table 1, Figure 2, Figure 2 supplements 1-**  
143 **6, Supplementary Data file 1 Section 1**). All models reported here provide significantly  
144 better fits compared to models without the fixed effect of community diversity, and  
145 coefficients of determination ( $R^2$ ) are higher with the inclusion of random effects,  
146 showing their importance (**Supplementary Data file 2**). Examples of how the diversity  
147 slope varies across lineages and environments are shown in **Figure 2** and **Figure 2**  
148 **supplements 2-6**. To assess the significance of these slope estimates in light of potential  
149 sampling bias and data structure (Gotelli & Colwell, 2001; Jarvinen, 1982), we  
150 considered null models, all of which randomize the associations between ASVs within a  
151 sample, thus randomizing any true biotic interactions. Models 1 and 2 are based on draws  
152 from the zero-sum multinomial (ZSM) distribution, which arises from the standard  
153 Neutral Theory of Biodiversity (**Methods**). Model 1, in which each microbiome sample  
154 is drawn from the same ZSM distribution, produces a significantly negative diversity  
155 slope (**Figure 2 supplement 7; Table 2**). Model 2, in which each environment draws  
156 from a separate distribution, is effectively a composite of Model 1 in which different  
157 environments, each with a negative slope, are 'stacked' to yield an overall positive slope  
158 (**Figure 2 supplement 7**). However, the Model 2 slope is not significant in a GLMM



159 accounting for variation across environments (**Table 2, Supplementary Data file 3**  
160 **Section 1.2**). In the real EMP data, most individual environments tend toward a positive  
161 slope (**Figure 2 supplement 8**). The tendency toward positive diversity slopes in the  
162 EMP is therefore not straightforwardly explained by neutral processes.

163 To estimate the power to detect either DBD or EC, we specifically added each of  
164 these effects to data simulated under a null model. As expected, adding DBD reversed the  
165 negative slope and rendered it positive (**Table 2; Figure 2 supplement 7,**  
166 **Supplementary Data file 3 Section 2.1**), suggesting reasonable power to detect DBD  
167 when truly present. In contrast, the addition of EC had little effect on the slope,  
168 suggesting low power to detect EC under some null models. Taken together, these  
169 modelling results suggest that positive diversity slopes observed in the EMP are more  
170 readily explained by DBD than by Neutral Theory, whereas negative slopes could be  
171 explained by EC, Neutral Theory, or some combination of the two.

172 Because taxonomic labels can be unavailable or inconsistent with phylogenetic  
173 relationships (Parks et al., 2018; Vos, 2011) we repeated the analyses using nucleotide  
174 sequence identity in the 16S rRNA gene instead of taxonomy, and again recovered  
175 generally positive diversity slopes (**Methods**). As a final sensitivity analysis, we repeated  
176 the GLMMs using unrarefied community Shannon diversity instead of richness  
177 (**Methods**) and obtained similar results, with generally positive diversity slopes that  
178 could in some cases be reversed depending on the lineage or environment (**Table 3,**  
179 **Supplementary Data file 1 Section 2**). The Shannon diversity metric is robust to  
180 sampling effort, suggesting that the results are not biased by undersampling in diverse  
181 biomes. Even if undersampling could bias the diversity slope downward in more diverse

182 samples, the effect is unlikely to be large at a rarefaction to 5,000 sequences, and only to  
 183 occur at the extremes of diversity (*e.g.* very many genera and high ASV:genus ratios) and  
 184 not at higher taxonomic levels (*e.g.* Class:Phylum) (**Figure 2 supplement 9**).

185

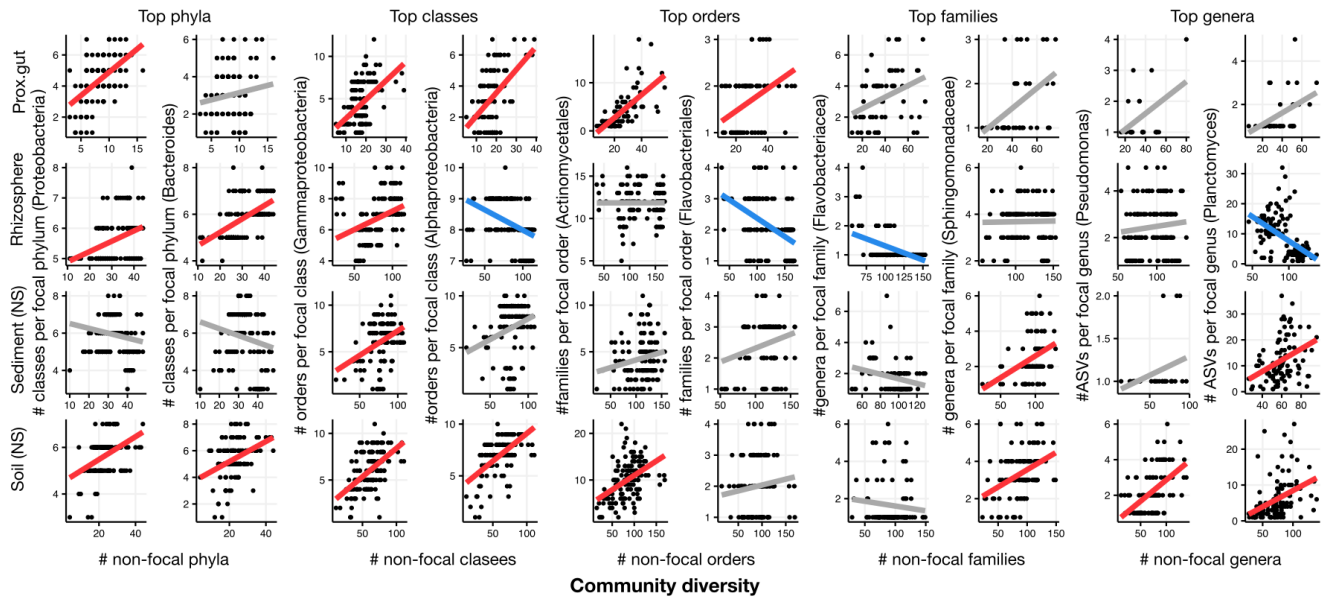

186

187 **Fig. 2. Focal lineage diversity as a function of community diversity in the top two**  
 188 **most prevalent taxa at each taxonomic level.** As in **Fig. 1**, the x-axes show community  
 189 diversity in units of the number of non-focal taxa (*e.g.* the number of non-Proteobacteria  
 190 phyla for the left-most column), and the y-axes show the taxonomic ratio within the focal  
 191 taxon (*e.g.* the number of classes within Proteobacteria). Significant positive diversity  
 192 slopes are shown in red, negative in blue (linear models,  $P < 0.05$ , Bonferroni corrected  
 193 for 17 tests), and non-significant in grey. Note that linear models are distinct from  
 194 GLMMs, and are for illustrative purposes only. Four representative environments are  
 195 shown (see **Figure 2 supplements 2-6** for plots in all 17 environments).

196

197 **DBD reaches a plateau at high diversity.** It is expected from theory and experimental  
 198 studies that a positive DBD relationship should eventually reach a plateau, giving way to  
 199 EC as niches become saturated (Brockhurst et al., 2007; Gómez & Buckling, 2013). This

200 expectation is borne out in our dataset, particularly in the nucleotide sequence-based  
201 analyses which support quadratic or cubic relationships over linear diversity slopes  
202 (**Figure 2 supplement 10**). For example, in the animal distal gut, a relatively low-  
203 diversity biome, we observed a strong linear DBD relationship at most phylogenetic  
204 depths; in contrast, the much more diverse soil biome clearly reaches a plateau (**Figure 2**  
205 **supplement 11**).

206         To comprehensively test the hypothesis that more diverse microbiomes  
207 experience weaker DBD due to saturated niche space, we used a GLMM including the  
208 interaction between diversity and environment as a fixed effect. We considered this  
209 model only for taxonomic ratios with significant diversity slope variation by environment  
210 (**Table 1**): Family:Order, Order:Class, and Class:Phylum. Diversity slopes were  
211 significantly higher in less diverse (often host-associated) biomes, suggesting that niche  
212 filling leads to a plateau of DBD in more diverse biomes (**Fig. 3, Supplementary Data**  
213 **file 1 Section 3**). The interaction observed in the real EMP data between community  
214 diversity and biome type in shaping focal lineage diversity was not observed under a  
215 neutral null (Model 2, in which each environment has its own characteristic level of  
216 diversity) (**Supplementary Data file 3 Section 1.2**). The DBD plateau observed in more  
217 diverse biomes is thus not readily explained by a neutral model, nor is rarefaction  
218 expected to bias the diversity slope estimates, particularly at the Class:Phylum level  
219 (**Figure 2 supplement 9**). This suggests that the plateau of DBD at higher levels of  
220 community diversity is not an artefact of data structure or sampling effort. Finally, we  
221 considered whether variation along the EC-DBD continuum could be explained by  
222 differential cell density across environments, which could affect both the frequency of

223 cell-cell interactions (a biological effect) or the sampling depth (a technical artefact).  
224 Although precise estimates of cell densities in all EMP biomes are not available, we  
225 extracted plausible ranges for eight biomes from the literature (Kennedy & de Luna,  
226 2005; Lindow & Brandl, 2003; Sender et al., 2016; Whitman et al., 1998) and annotated  
227 these in **Figure 3**. It is clear from this figure that relatively high- and low-density samples  
228 are found along the range of community taxonomic diversities, demonstrating that cell  
229 density is unlikely to drive the trend of decreasing diversity slopes with increasing  
230 community diversity.  
231

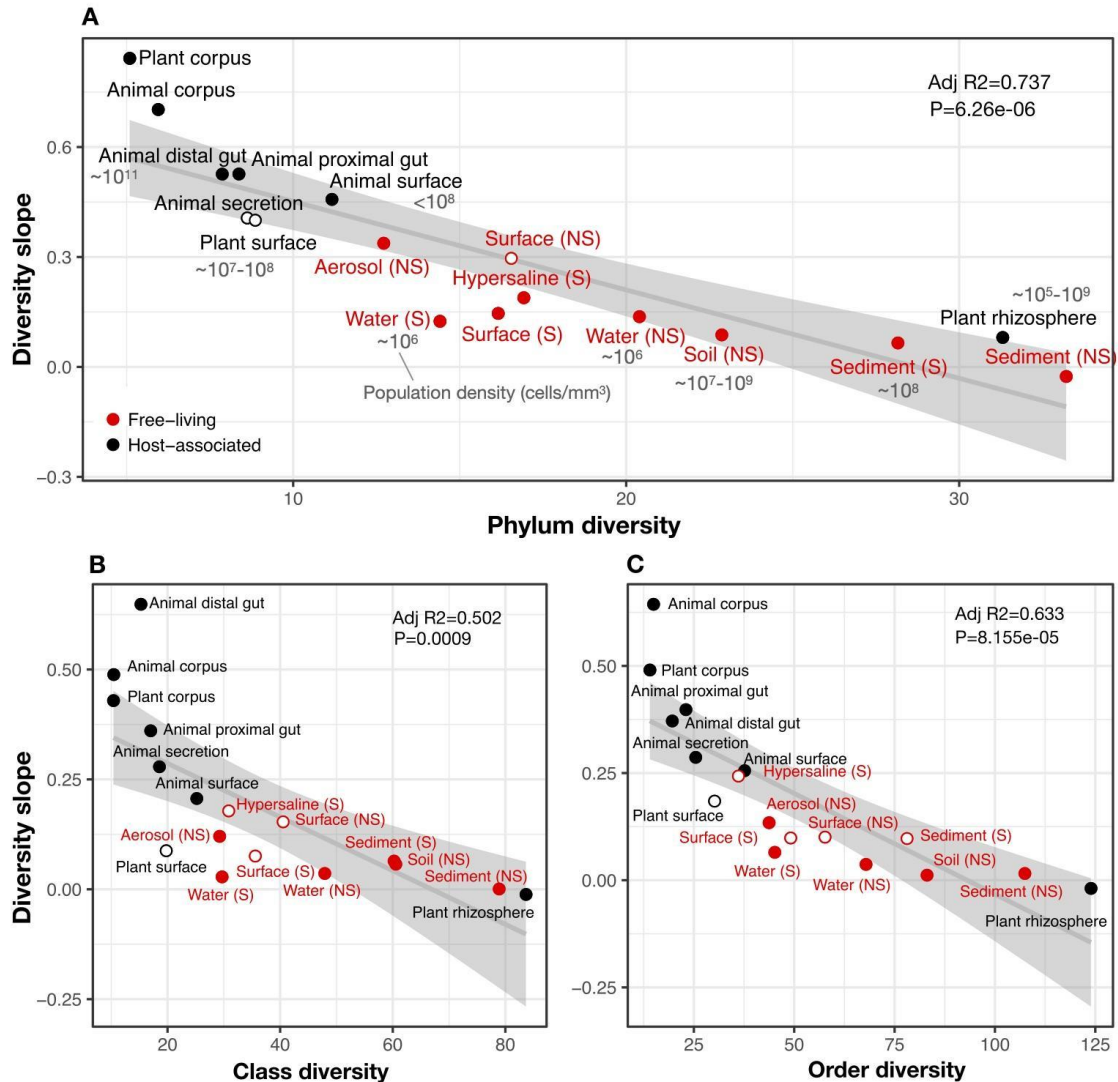

232

233 **Fig. 3. The diversity slope of focal taxa is higher in low-diversity (often host-**  
 234 **associated) microbiomes.** The x-axis shows the mean number of non-focal taxa: (A)  
 235 phyla, B) classes, and C) orders in each biome. On the y-axis, the diversity slope was  
 236 estimated by a GLMM predicting focal lineage diversity as a function of the interaction  
 237 between community diversity and environment type at the level of A) Class:Phylum, B)  
 238 Order:Class, and C) Family:Order ratios (**Supplementary Data file 1 Section 3**). The  
 239 line represents a linear regression; the shaded area depicts 95% confidence limits of the  
 240 fitted values. Adjusted  $R^2$  and  $P$ -values from the linear fits are shown at the top right of  
 241 each panel. See **Supplementary Data file 2** for model goodness of fit. Slopes not  
 242 significantly different from zero are shown as empty circles. Estimates of bacterial cell

243 density from the literature are indicated in grey text, in units of bacteria/mm<sup>3</sup>. For animal  
244 (skin) and plant surface, units of bacteria/mm<sup>2</sup> were converted to mm<sup>3</sup> assuming layers of  
245 bacteria 1 micron thick. For rhizosphere samples we assume a density of 1-2g/cm<sup>3</sup>  
246 (Kennedy & de Luna, 2005).

247

248 **Abiotic drivers of diversity.** Our results thus far suggest that community diversity is a  
249 major determinant of the EC-DBD continuum, and by extension that biotic interactions  
250 may override abiotic factors in determining where a community lies on the continuum.  
251 To formally test for the additional role abiotic drivers might play in generating the  
252 observed EC-DBD continuum, we analyzed two data sets in more detail.

253 First, we analyzed a subset of 192 EMP samples with measurements of four key  
254 abiotic factors shown to affect microbial diversity (pH, temperature, latitude, and  
255 elevation; (Delgado-Baquerizo et al., 2018; Lauber et al., 2009; Power et al., 2018;  
256 Schluter & Pennell, 2017)). We fitted a GLMM with focal lineage-specific diversity as  
257 the dependent variable, and with the number of non-focal lineages, the four abiotic  
258 factors and their interactions as predictors (fixed effects). As in the full EMP dataset  
259 (**Table 1**), focal lineage diversity was positively associated with community diversity at  
260 all taxonomic ratios in the EMP subset (**Table 4**). As expected, certain abiotic factors,  
261 alone or in combination with diversity, had significant effects on focal lineage diversity  
262 (**Table 4**). However, the effects of abiotic factors were always weaker than the effect of  
263 community diversity (**Table 4; Supplementary Data file 1 Section 4**).

264 Second, we used a global 16S sequencing dataset of 237 soil samples associated  
265 with more detailed environmental metadata (Delgado-Baquerizo et al., 2018) which we  
266 reprocessed to yield ASVs comparable to those in the EMP (**Methods**). This dataset

267 revealed weaker evidence for DBD and stronger effects of abiotic variables on diversity.  
268 Community diversity generally had significant positive effects on focal-lineage diversity,  
269 but the effect was weak and not detectable at all taxonomic ratios (**Table 5**). Known  
270 abiotic drivers of soil bacterial diversity such as pH (Lauber et al., 2009) and latitude  
271 (Delgado-Baquerizo et al., 2018) had effects of similar or stronger magnitude compared  
272 to the effect of community diversity (**Table 5, Supplementary Data file 4**). The  
273 relatively weak effect of DBD and strong effect of abiotic drivers on diversity in this soil  
274 dataset can be explained by the fact that soils generally are highly diverse and have  
275 relatively low diversity slopes (**Figure 3**).

276 We note that it remains possible that unmeasured abiotic effects could explain  
277 some of the DBD effects observed in the EMP. Although only a small subset of abiotic  
278 factors was considered, the generally positive diversity slopes in the EMP are not likely  
279 to be driven by these factors in the abiotic environment (**Table 4**). Specifically, we  
280 consider it unlikely that unmeasured abiotic factors would always act similarly, and in the  
281 same direction across multiple different environments, to drive DBD. However, as  
282 demonstrated in soil (**Table 5**), abiotic factors may become increasingly important in  
283 highly diverse biomes with weak DBD.

284

285 **DBD is more pronounced in resident taxa than in migrant- or generalist taxa.** A  
286 recent meta-analysis of 16S sequence data from a variety of biomes suggests there is an  
287 important distinction between generalist lineages found in many environments, compared  
288 to specialists with a more restricted distribution (Sriswasdi et al., 2017). Generalists were  
289 inferred to have higher speciation rates, suggesting that the DBD-EC balance might differ

290 between generalists and specialists (Sriswasdi et al., 2017). To further investigate this  
291 difference, we defined ‘residents’, taxa with a strong preference for a specific biome, in  
292 addition to generalists without a strong biome preference in the EMP dataset. We first  
293 clustered environmental samples by their genus-level community composition using  
294 fuzzy *k*-means clustering (**Fig. 4a**), which identified three major clusters: ‘animal-  
295 associated’, ‘saline’, and ‘non-saline’. The clustering included some outliers (*e.g.* plant  
296 corpus grouping with animals), but was generally consistent with known distinctions  
297 between host-associated vs. free-living (Thompson et al., 2017), and saline vs. non-saline  
298 communities (Auguet et al., 2010; Lozupone & Knight, 2007). Resident genera were  
299 defined as those with a strong preference for a particular environment cluster (whether  
300 due to dispersal limitation or narrow niche breadth) using indicator species analysis  
301 (permutation test,  $P < 0.05$ ; **Fig. 4a**; **Figure 4 supplement 1**; **Supplementary Data file 5**),  
302 and genera without a strong preference were considered generalists. When residents of  
303 one environmental cluster were (relatively infrequently) observed in a different cluster,  
304 we defined them as “migrants” in that sample. For each environment cluster, we ran a  
305 GLMM with resident genus-level diversity (the number of non-focal genera) as a  
306 predictor of focal-lineage diversity (the ASV:Genus ratio) for residents, generalists, or  
307 migrants to that sample (**Supplementary Data file 1 Section 5**).

308 Resident community diversity had no significant effect on the diversity of  
309 generalists in animal-associated, saline and non-saline clusters (GLMM, Wald test,  
310  $P > 0.05$ ), but was positively correlated with lineage-specific resident diversity (GLMM,  
311 Wald test,  $z = 7.1$ ,  $P = 1.25e-12$ ;  $z = 3.316$ ,  $P = 0.0009$ ;  $z = 7.109$ ,  $P = 1.17e-12$ , respectively).  
312 Resident community diversity significantly decreased migrant diversity in saline



313 (GLMM,  $z=-3.194$ ,  $P=0.0014$ ) and non-saline environment clusters (GLMM,  $z=-2.840$ ,  
 314  $P=0.0045$ ), but had no significant effect in the animal-associated cluster (GLMM,  
 315  $P>0.05$ ) (**Fig. 4b**). These results suggest that, although generalist lineages may have  
 316 higher speciation rates and colonize more habitats than specialists (Sriswasdi et al.,  
 317 2017), they have lower diversity slopes. Migrants to the “wrong” environment experience  
 318 even less DBD, and are even subject to EC in two out of three environment types (**Fig.**  
 319 **4b**). The accumulation of diversity via successful establishment of migrants may thus be  
 320 limited, presumably because most niches are already occupied by residents.

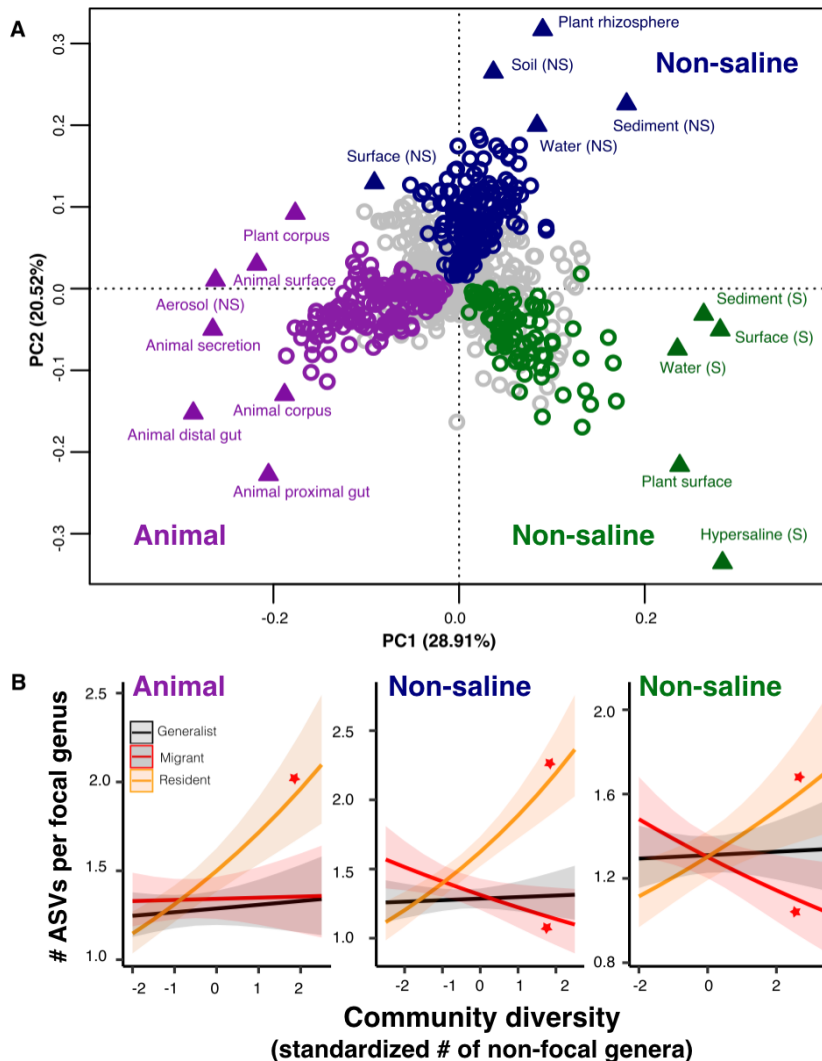

321

322 **Fig. 4. The DBD relationship varies between resident and non-resident genera. (A)**  
323 **Ordination showing genera clustering into their preferred environment clusters.** The  
324 matrix of 1128 genera (rows) by 17 environments (columns), with the matrix entries  
325 indicating the percentage of samples from a given environment in which each genus is  
326 present, was subjected to principal components analysis (PCA). Circles indicate genera  
327 and triangles indicate environments (EMPO 3 biomes). Colored circles are genera  
328 inferred by indicator species analysis to be residents of a certain environmental cluster,  
329 and grey circles are generalist genera. The three environment clusters identified by fuzzy  
330 *k*-means clustering are: Non-saline (NS, blue), saline (S, green) and animal-associated  
331 (purple). Triangles of the same color indicate EMPO 3 biomes clustered into the same  
332 environmental cluster. **(B) DBD in resident versus non-resident genera across**  
333 **environment clusters.** Results of GLMMs modeling focal lineage diversity as a function  
334 of the interaction between community diversity and resident/migrant/generalist status.  
335 The x-axis shows the standardized number of non-focal resident genera (community  
336 diversity); the y-axis shows the number of ASVs per focal genus. Resident focal genera  
337 are shown in orange, migrant focal genera in red, and generalist focal genera in black.  
338 Red stars indicate a significantly positive or negative slope (Wald test,  $P < 0.005$ ). See  
339 **Supplementary Data file 2** for model goodness of fit.

340

## 341 **Discussion**

342 Using ~10 million individual marker sequences from the EMP, we demonstrate an overall  
343 trend for diversity in focal lineages to be positively associated with overall community  
344 diversity, albeit with significant variation across lineages and environments. The strength  
345 of the DBD relationship dissipates with increasing microbiome diversity, which we  
346 hypothesize is caused by niche saturation. In more diverse biomes such as soil, abiotic  
347 factors therefore may become relatively more important in driving focal-lineage diversity.  
348 The effect of DBD is strongest among habitat specialists (residents), suggesting that long-  
349 term niche adaptation tends to select against the establishment of migrant diversity.

350           While most of the DBD literature considers a model of evolutionary  
351 diversification (Schluter & Pennell, 2017; Whittaker, 1972), our results pertain mainly to  
352 ecological community assembly dynamics. At the limited resolution of 16S rRNA gene  
353 sequences, we do not expect measurable diversification within an individual microbiome  
354 sample (Kuo & Ochman, 2009b); however, community diversity could still select for (as  
355 in DBD) or against (as in EC) increasing diversity in a focal lineage, even if this lineage  
356 diversified before the sampled community assembled. Future work with higher resolution  
357 genomic or metagenomic data will enable testing if and how DBD arises in microbial  
358 communities via evolutionary diversification, and also how prokaryote diversification is  
359 affected by other community members including phages (Brockhurst et al., 2005),  
360 protists (Meyer & Kassen, 2007), and fungi (Kastman et al., 2016). Predator-prey, cross-  
361 feeding, and other biotic interactions with these non-prokaryotic community members  
362 could explain some of the unaccounted variation we observed in diversity slopes across  
363 environments.

364           Our dataset also provides an opportunity to explore how DBD relates with  
365 genome size evolution. Bacteria with larger repertoires of accessory genes, and thus  
366 larger genomes, are able to occupy a wider range of niches (Barberán et al., 2014). Taxa  
367 with larger genomes might therefore be hypothesized to better survive and thrive when  
368 they disperse into a new location, exhibiting stronger DBD. Although a comprehensive  
369 test of this hypothesis will require higher resolution genomic or metagenomic data, as a  
370 preliminary exploration we assigned genome sizes to 576 focal genera for which at least  
371 one whole genome sequence was available (using the largest recorded genome size for  
372 each genus) and added an interaction term between genome size and diversity as a fixed

373 effect in the GLMM (**Methods**). Consistent with our expectation, we observed a  
374 significant positive effect of genome size on the diversity slope (GLMM, Wald test,  
375  $z=2.5$ ,  $P=0.01$ ; **Fig. 5, Supplementary Data file 1 Section 6**). This effect was not  
376 observed in null models, in which the interaction between community diversity and focal  
377 genus genome size was never significant (**Supplementary Data file 3 Section 1.3 and**  
378 **2.2**) and so this effect of genome size cannot be trivially explained by data structure. The  
379 positive relationship between genome size and DBD is likely even stronger than  
380 estimated, because assigning genome sizes to entire genera is imprecise (*i.e.* there is  
381 variation in genome size within a genus, or even within species), therefore weakening the  
382 correlation.

383         The positive correlation between genome size and DBD observed here could be  
384 driven by larger metabolic repertoires encoded by larger genomes (40), potentially  
385 creating more opportunities to benefit from cross-feeding, niche construction (San Roman  
386 & Wagner, 2018), and other interspecies interactions. This tendency appears to be at odds  
387 with the Black Queen hypothesis, which predicts that social conflict between interacting  
388 species leads to the inactivation and loss of genes involved in shareable metabolites  
389 (public goods), eventually resulting in reduced genome size (Morris & Lenski, 2012).  
390 Such a process would produce a negative correlation between the degree of species  
391 interactions (*i.e.* community diversity) and genome size (Morris & Lenski, 2012). The  
392 interaction between genome size, biotic interactions and diversification thus deserves  
393 further study.

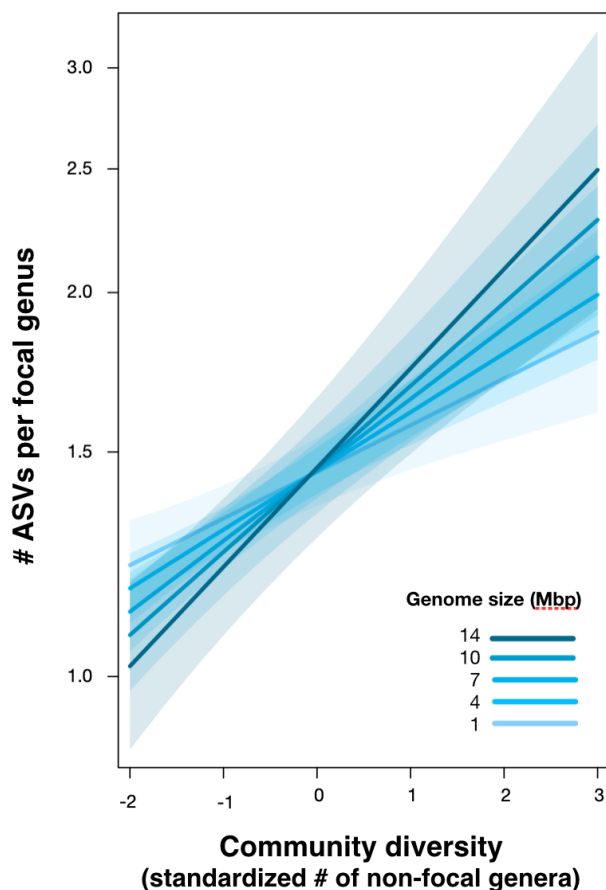

394

395 **Fig. 5. Positive effect of genome size on DBD.** Results are shown from a GLMM  
396 predicting focal lineage diversity as a function of the interaction between community  
397 diversity and genome size at the ASV:Genus ratio (**Supplementary Data file 1 Section**  
398 **6**). The x-axis shows the standardized number of non-focal genera (community diversity);  
399 the y-axis shows the number of ASVs per focal genus. Variable diversity slopes  
400 corresponding to different genome sizes are shown in a blue color gradient; the shaded  
401 area depicts 95% confidence limits of the fitted values. See **Supplementary Data file 2**  
402 for model goodness of fit.

403

404 Alongside theory and experimental data, the EMP survey data provide a window  
405 into the biotic drivers of microbial diversity in nature. In particular, our correlational  
406 results support previous experimental and theoretical results showing that DBD is strong

407 when community diversity is low (Calcagno et al., 2017; Jousset et al., 2016), driving the  
408 accumulation of diversity in a positive feedback loop until niches are filled and EC starts  
409 to predominate (Bailey et al., 2013; Brockhurst et al., 2007; Gómez & Buckling, 2013;  
410 Meyer & Kassen, 2007). However, due to the correlational nature of the EMP data, it is  
411 not possible to test whether DBD is primarily due to the creation of novel niches via  
412 biotic interactions and niche construction (Laland et al., 1999), or due to increased  
413 competition leading to specialization on underexploited resources (Hibbing et al., 2010;  
414 Jousset et al., 2016). We hope future higher resolution genomic studies, and  
415 complementary experiments, will be able to elucidate the types of biotic interactions that  
416 promote microbiome diversity. Regardless of the underlying mechanisms, our results  
417 demonstrate a general scaling between different levels of community diversity, which has  
418 important implications for modeling and predicting community function and stability in  
419 response to perturbations (Coyte et al., 2015; Pennekamp et al., 2018). The answer to the  
420 question ‘why are microbiomes so diverse?’ might in a large part be because  
421 microbiomes are so diverse (Emerson & Kolm, 2005).

422

#### 423 **Acknowledgements.**

424 We thank Luke Thompson for assistance obtaining EMP data and Zofia Ecaterina  
425 Taranu, Vincent Fugère and Guillaume Larocque for advice on GLMMs. We are also  
426 grateful to Steven Kembel, Tom Battin, the reviewers Eric Kemen and Benjamin E.  
427 Wolfe, and the editor Detlef Weigel for critical comments that improved the manuscript.

428 **Funding:** This project was made possible by an NSERC Discovery Grant and Canada  
429 Research Chair to BJS.

430 **Competing interests:** none to declare.

431

432 **Data and materials availability:** All data is available from the Earth Microbiome

433 Project ([ftp.microbio.me](ftp://ftp.microbio.me)), as detailed in the Methods. All computer code used for

434 analysis are available at <https://github.com/Naima16/dbd.git>.

435

436 **Tables**

437 **Table 1. Effects of community diversity on focal lineage diversity across taxonomic**  
 438 **ratios.** The GLMMs showed statistically a significant positive effect of community  
 439 diversity on focal lineage diversity. Each row reports the effect of community diversity  
 440 on focal lineage diversity (Div), as well as its standard error, Wald z-statistic for its effect  
 441 size and the corresponding *P*-value (left section), or standard deviation on the slope for  
 442 the significant random effects (right section). SE=standard error, Env=environment type,  
 443 Lin=lineage type, Lab=Principal Investigator ID, Sample=EMP Sample ID. Interactions  
 444 are denoted as ‘\*’. n.s.=not significant (likelihood-ratio test). All models provide a  
 445 significantly better fit than null models without fixed effects ( $\Delta AIC > 10$  and  $P < 0.05$ ;  
 446 **Supplementary Data file 2**).  
 447  
 448

|                     | Slope (fixed effects) |       |       |          | Standard deviation on the slope (random effects) |       |         |         |        |
|---------------------|-----------------------|-------|-------|----------|--------------------------------------------------|-------|---------|---------|--------|
|                     | Div                   | SE    | z     | <i>P</i> | Env                                              | Lin   | Lin*Env | Env*Lab | Sample |
| <b>ASV:Genus</b>    | 0.091                 | 0.016 | 5.792 | 6.95e-09 | n.s.                                             | 0.074 | 0.142   | 0.114   | 0.067  |
| <b>Genus:Family</b> | 0.047                 | 0.008 | 5.911 | 3.41e-09 | n.s.                                             | 0.071 | 0.07    | 0.039   | n.s.   |
| <b>Family:Order</b> | 0.119                 | 0.017 | 7.001 | 2.54e-12 | 0.023                                            | 0.094 | 0.092   | 0.106   | n.s.   |
| <b>Order:Class</b>  | 0.109                 | 0.020 | 5.447 | 5.13e-08 | 0.05                                             | 0.141 | 0.078   | 0.051   | n.s.   |
| <b>Class:Phylum</b> | 0.272                 | 0.043 | 6.341 | 2.29e-10 | 0.119                                            | 0.174 | 0.119   | 0.114   | n.s.   |

449



450 **Table 2. GLMMs applied to data simulated under null models.** Null models 1 and 2  
 451 were generated under the ZSM distribution, with a single distribution for the whole  
 452 dataset (Model 1) or one distribution per environment (Model 2). Model 3 is similar to  
 453 Model 1, except with a single Poisson distribution for the whole dataset, and +DBD or  
 454 +EC refer to adding these effects to 100% of ASVs (see **Methods** and **Figure 2**  
 455 **supplement 7**). Each row reports the effect of community diversity on focal lineage  
 456 diversity (Div), as well as its standard error, Wald z-statistic for its effect size and the  
 457 corresponding *P*-value (Wald test) (left section), or standard deviation on the slope for  
 458 the significant random effects (right section). SE=standard error, Env=environment type,  
 459 Lin=lineage type, Sample=EMP Sample ID. n.s.=not significant (likelihood-ratio test),  
 460 n.t.= not tested, because separate environments were not included in Models 1 or 3.  
 461

|                      | Slope (fixed effects) |       |        |                   | Stand dev on the slope (random effects) |       |         |        |
|----------------------|-----------------------|-------|--------|-------------------|-----------------------------------------|-------|---------|--------|
|                      | Div                   | SE    | z      | <i>P</i>          | Env                                     | Lin   | Lin*Env | Sample |
| <b>Model 1</b>       | <b>-0.005</b>         | 0.000 | -9.807 | <b>&lt;2e -16</b> | n.t.                                    | 0.639 | n.t.    | n.s.   |
| <b>Model 2</b>       | n.s.                  |       |        |                   |                                         |       |         |        |
| <b>Model 3</b>       | <b>-0.012</b>         | 0.002 | -6.552 | <b>5.69e-11</b>   | n.t.                                    | 0.021 | n.t.    | n.s.   |
| <b>Model 3 + DBD</b> | <b>0.016</b>          | 0.001 | 11.48  | <b>&lt;2e-16</b>  | n.t.                                    | 0.008 | n.t.    | n.s.   |
| <b>Model 3 + EC</b>  | <b>-0.011</b>         | 0.002 | -6.14  | <b>8.26e-10</b>   | n.t.                                    | ns    | n.t.    | n.s.   |

462

463 **Table 3. GLMMs with community diversity measured using Shannon diversity.**  
464 Results are shown from GLMMs with Shannon diversity of non-focal taxa (Div) as a  
465 predictor of ASVs richness of focal taxa. Each row reports the estimate (Div), as well as  
466 its standard error, Wald z-statistic for its effect size and the corresponding *P*-value (Wald  
467 test) (left section), or standard deviation on the slope for the significant random effects  
468 (right section). SE=standard error, Env=environment type, Lin=lineage type,  
469 Lab=Principal Investigator ID, Sample=EMP Sample ID. n.s.=not significant (likelihood-  
470 ratio test).  
471

|               | Fixed effects |       |       |          | Random effects |       |         |         |        |
|---------------|---------------|-------|-------|----------|----------------|-------|---------|---------|--------|
|               | Div           | SE    | z     | P        | Env            | Lin   | Env*Lin | Env*Lab | Sample |
| <b>Genus</b>  | 0.055         | 0.013 | 4.33  | 1.49e-05 | n.s.           | 0.08  | 0.15    | 0.085   | 0.054  |
| <b>Family</b> | 0.148         | 0.027 | 6.491 | 8.51e-11 | n.s.           | 0.184 | 0.268   | 0.16    | 0.134  |
| <b>Order</b>  | 0.378         | 0.038 | 9.864 | <2e-16   | n.s.           | 0.34  | 0.417   | 0.258   | 0.202  |
| <b>Class</b>  | 0.398         | 0.05  | 7.973 | 1.54e-15 | n.s.           | 0.369 | 0.46    | 0.326   | 0.262  |
| <b>Phylum</b> | 0.319         | 0.088 | 3.614 | 0.0003   | 0.169          | 0.316 | 0.5     | 0.495   | 0.378  |

472

473 **Table 4. Community diversity has a stronger effect than abiotic factors on focal lineage**  
 474 **diversity (EMP dataset).** Results are shown from GLMMs with community diversity, four  
 475 abiotic factors (temperature, elevation, pH, and latitude), and their interactions with community  
 476 diversity, as predictors of focal lineage diversity. Random effects on the intercept included  
 477 environment, lineage, lab ID and sample ID. Each row reports the taxonomic ratio, the predictors  
 478 used in the GLMM (fixed effects only), their estimate (Est), standard error (SE) and *P*-value (*P*)  
 479 (Wald test). Interactions are denoted as ‘\*’. Random effects are not shown.  
 480

|                     | Predictor       | Est    | SE    | P        |
|---------------------|-----------------|--------|-------|----------|
| <b>ASV:Genus</b>    | Div             | 0.128  | 0.013 | < 2e-16  |
|                     | Temperature     | 0.04   | 0.014 | 0.00479  |
|                     | Div*Temperature | 0.043  | 0.014 | 0.00175  |
|                     | Div*Latitude    | 0.031  | 0.013 | 0.02119  |
|                     | Div*Elevation   | -0.031 | 0.014 | 0.02829  |
| <b>Genus:Family</b> | Div             | 0.094  | 0.009 | < 2e-16  |
|                     | Temperature     | 0.026  | 0.009 | 0.00268  |
|                     | pH              | -0.042 | 0.009 | 5.88e-06 |
| <b>Family:Order</b> | Div             | 0.131  | 0.01  | < 2e-16  |
| <b>Order:Class</b>  | Div             | 0.184  | 0.01  | < 2e-16  |
|                     | Div*Temperature | 0.032  | 0.009 | 0.000827 |
|                     | Div*Latitude    | 0.023  | 0.008 | 0.005403 |
| <b>Class:Phylum</b> | Div             | 0.236  | 0.011 | < 2e-16  |
|                     | Div*Temperature | 0.059  | 0.014 | 2.15e-05 |
|                     | Div*Latitude    | 0.03   | 0.011 | 0.00884  |

481

482 **Table 5. GLMMs applied to a soil dataset.** Each row reports the taxonomic ratio, the predictors  
 483 used in the GLMM (fixed effects only), their estimate (Est), standard error (SE) and *P*-value (*P*)  
 484 (Wald test). Left columns: GLMM with community diversity (Div) and all abiotic variables  
 485 considered separately, as predictors of focal lineage diversity. Right columns: GLMM with  
 486 community diversity (Div) and the three first principle components (PCs) representing abiotic  
 487 variables, as predictors of focal lineage diversity. n.s., non-significant (LRT test). All models  
 488 provide a significantly better fit than null models without fixed effects ( $\Delta\text{AIC} > 10$  and  $P < 0.05$ ;  
 489 **Supplementary Data file 2**), except for the GLMM with abiotic factors at the Family:Order level,  
 490 where latitude has a significant effect on focal lineage diversity but its effect is nearly null, with a  
 491  $\Delta\text{AIC}$  between full and null model of 4 and a null marginal  $R^2$ .  
 492

|                     | GLMMs with abiotic variables                 |         |        |          | GLMMs with the 3 first PCs |        |       |          |
|---------------------|----------------------------------------------|---------|--------|----------|----------------------------|--------|-------|----------|
|                     | Predictor                                    | Est     | SE     | P        | Predictor                  | Est    | SE    | P        |
| <b>ASV:Genus</b>    | Div                                          | n.s.    |        |          | Div                        | 0.064  | 0.016 | 9.47e-05 |
|                     | Latitude                                     | 0.294   | 0.025  | < 2e-16  | PC1                        | -0.065 | 0.007 | < 2e-16  |
|                     | UV_light                                     | -0.177  | 0.016  | < 2e-16  | PC2                        | -0.03  | 0.006 | 1.98e-05 |
|                     | MDR                                          | 0.028   | 0.006  | 7.12e-06 |                            |        |       |          |
|                     | NPP2003_2015                                 | -0.066  | 0.005  | < 2e-16  |                            |        |       |          |
|                     | Latitude^2                                   | -0.3    | 0.029  | < 2e-16  |                            |        |       |          |
|                     | Clay_silt^2                                  | -0.012  | 0.004  | 0.003    |                            |        |       |          |
|                     | Soil_N^2                                     | -0.007  | 0.001  | 1.66e-06 |                            |        |       |          |
|                     | Soil_C_N_ratio                               | 0.003   | 0.001  | 0.004    |                            |        |       |          |
|                     | PSEA^2                                       | 0.01    | 0.002  | 4.84e-06 |                            |        |       |          |
|                     | MDR^2                                        | 0.017   | 0.003  | 2.40e-08 |                            |        |       |          |
|                     | NPP2003_2015                                 | -0.016  | 0.004  | 0.0001   |                            |        |       |          |
| <b>Genus:Family</b> | Div                                          | 0.032   | 0.01   | 0.0011   | Div                        | 0.033  | 0.01  | 0.001    |
|                     | Latitude                                     | -0.035  | 0.006  | 2.04e-09 | PC1                        | -0.016 | 0.006 | 0.02     |
|                     |                                              |         |        |          | PC2                        | 0.02   | 0.006 | 0.00089  |
| <b>Family:Order</b> | Div                                          | n.s.    |        |          | Div                        | n.s.   |       |          |
|                     | Latitude                                     | -0.0005 | 0.0002 | 0.0105   | PC1                        | -0.026 | 0.007 | 0.00032  |
|                     |                                              |         |        |          | Div*PC1                    | 0.04   | 0.006 | 2.14e-12 |
|                     |                                              |         |        |          | Div*PC3                    | 0.023  | 0.005 | 1.68e-06 |
| <b>Order:Class</b>  | Null model with no predictor was significant |         |        |          |                            |        |       |          |
| <b>Class:Phylum</b> | Div                                          | 0.032   | 0.01   | 0.00174  | Div                        | 0.032  | 0.01  | 0.003    |
|                     | pH                                           | 0.074   | 0.01   | 4.37e-13 | PC1                        | -0.051 | 0.01  | 3.54e-07 |
|                     |                                              |         |        |          | PC2                        | -0.028 | 0.01  | 0.006    |

493  
 494  
 495  
 496  
 497

## 498 **Supplementary Figure Legends**

499

500 **Figure 2 supplement 1. Distributions of diversity slope estimates across different**  
501 **random effects, from the GLMMs predicting focal lineage diversity as a function of**  
502 **community diversity. (A) Class:Phylum, (B) Order:Class, (C) Family:Order, (D)**  
503 **Genus:Family, and (E) ASV:Genus.** Estimation of random effect coefficients from the  
504 GLMMs (Table S1), shows that the effect of diversity on focal lineage diversity (slope  
505 estimates) are generally positive but could be negative in some lineages or combinations  
506 of environment, lineage (Environment\*Lineage), and the laboratory that submitted the  
507 dataset (Environment\*Lab).

508

509 **Figure 2 supplement 2. Focal lineage diversity as a function of community diversity**  
510 **across biomes in the three most prevalent phyla. (A) Proteobacteria, (B) Bacteroidetes,**  
511 **(C) Actinobacteria.** Linear models are shown for the number of classes per phylum (y-  
512 axis) as a function of community diversity (number of non-focal phyla, x-axis) in each of  
513 the 17 environments (EMPO3 biomes). Only environments containing the focal lineage  
514 are shown. *P*-values are Bonferroni corrected for 17 tests. Significant ( $P < 0.05$ ) models  
515 are shown with red trend lines, non-significant ( $P > 0.05$ ) trends are shown in blue.

516

517 **Figure 2 supplement 3. Focal lineage diversity as a function of community diversity**  
518 **across biomes in the three most prevalent classes.** Linear models are shown for the  
519 number of orders per class (y-axis) as a function of community diversity (non-focal  
520 classes, x-axis) in each of the 17 environments (EMPO3 biomes). Only environments  
521 containing the focal lineage are shown. Significant positive diversity slopes are shown in  
522 red, negative in blue (linear models,  $P < 0.05$ , Bonferroni corrected for 17 tests), and non-  
523 significant in grey.

524

525 **Figure 2 supplement 4. Focal lineage diversity as a function of community diversity**  
526 **across biomes in the three most prevalent orders.** Linear models are shown for the  
527 number of families per order (y-axis) as a function of community diversity (non-focal  
528 orders, x-axis) in each of the 17 environments (EMPO3 biomes). Only environments  
529 containing the focal lineage are shown. Significant positive diversity slopes are shown in  
530 red, negative in blue (linear models,  $P < 0.05$ , Bonferroni corrected for 17 tests), and non-  
531 significant in grey.

532

533 **Figure 2 supplement 5. Focal lineage diversity as a function of community diversity**  
534 **across biomes in the three most prevalent families.** Linear models are shown for  
535 genera per family (y-axis) as a function of community diversity (non-focal families, x-  
536 axis) in each of the 17 environments (EMPO3 biomes). Only environments containing the  
537 focal lineage are shown. Significant positive diversity slopes are shown in red, negative  
538 in blue (linear models,  $P < 0.05$ , Bonferroni corrected for 17 tests), and non-significant in  
539 grey.

540

541 **Figure 2 supplement 6. Focal lineage diversity as a function of community diversity**  
542 **across biomes in the three most prevalent genera.** Linear models are shown for ASVs  
543 per genus (y-axis) as a function of community diversity (non-focal genera, x-axis) in each

544 of the 17 environments (EMPO3 biomes). Only environments containing the focal  
545 lineage are shown. Significant positive diversity slopes are shown in red, negative in blue  
546 (linear models,  $P < 0.05$ , Bonferroni corrected for 17 tests), and non-significant in grey.  
547

548 **Figure 2 supplement 7. Null models based on Neutral Theory.** Results are shown from  
549 data simulated under (A) neutral Model 1, (B) neutral Model 2, or (C) neutral Model 3.  
550 Model 1 is sampled from the zero-sum multinomial distribution with a single distribution  
551 for the whole dataset, while Model 2 includes a separate distribution for each of the 17  
552 different environments (EMPO 3 biomes). In Model 3 (C), the effect of DBD (top rows)  
553 or EC (bottom rows) are “spiked in” at different levels, ranging from 0 to 100% of ASVs  
554 in a sample. Blue lines show a linear fit, with slopes ( $m$ ) estimated by GLMM in selected  
555 panels. See Methods for model details, and Table 2 and Supplementary Data file 3,  
556 Section 1.2 for full GLMM results.  
557

558 **Figure 2 supplement 8. Lineage diversity (mean ASV:Genus ratio among all**  
559 **lineages) as a function of community diversity (number of genera) in the EMP data.**  
560 Samples from different environments (EMPO level 3) are shown in different colors, each  
561 with their corresponding linear model fit.  
562

563 **Figure 2 supplement 9. Taxonomic ratios estimated from simulated rarefied**  
564 **sequence data.** Each panel simulates a set of microbiome samples that differ in their  
565 diversity (number of genera in left panels **A** and **B**, number of phyla in right panels **C** and  
566 **D**) while maintaining a set true taxonomic ratio (horizontal black line). **(A)** True ratio set  
567 to 2 ASVs/genus, close to the per-sample mean and median in the real EMP data, in a  
568 range of samples between 1 and 1128 named genera, as observed in the real EMP data.  
569 **(B)** True ratio set to 20 ASVs/genus, equal to the overall mean of 22,014 named ASVs in  
570 1128 named genera, and close to the maximum ratios observed in individual samples  
571 (Fig. 2 supplement 6). Insets show the ranges of 1-50 and 51-150 genera, approximating  
572 observations from lower- or higher-diversity samples such as gut and soil, respectively  
573 (Fig. 2 supplement 6). The insets only show the rarefaction to 5,000 sequences, as used in  
574 the real EMP dataset. **(C)** True ratio set to 3 classes/phylum, close to the per-sample  
575 mean and median in the real EMP data, in a range of samples between 1 and 84 named  
576 phyla, as observed in the real EMP data. **(D)** True ratio set to 10 classes/phylum, close to  
577 the maximum ratios observed in individual samples (Fig. S2). Different rarefaction levels  
578 are shown as different colored lines.  
579

580 **Figure 2 supplement 10. Linear, quadratic and cubic models for the relationship**  
581 **between focal lineage diversity and community diversity for varying levels of %**  
582 **nucleotide identity.** Community diversity was estimated as the number of clusters at a  
583 focal level ( $d_i$ ) and focal lineage diversity as the mean of the clusters at the rank above  
584 ( $d_{i+1}/d_i$ ). All  $P$ -values are  $< 0.001$ . Linear fit (grey); quadratic fit (blue), cubic fit (red);  
585 same colors for the associated adjusted  $R^2$ . The x-axis (diversity) shows the number of  
586 clusters at the focal percent-identity level ( $d_i$ ), and the y-axis (diversification) is the mean  
587 of the clusters at the rank above ( $d_{i+1}/d_i$ ).  
588

589 **Figure 2 supplement 11. Linear, quadratic and cubic models for each environment**  
590 **type for varying levels of % nucleotide identity.** Community diversity was estimated as  
591 the number of clusters at a focal level ( $d_i$ ) and focal lineage diversity as the mean of the  
592 clusters at the rank above ( $d_{i+1}/d_i$ ). Linear (grey), quadratic (blue) and cubic (red), with  
593 corresponding adjusted R-squared values in the same colour.  $P$ -values are Bonferroni  
594 corrected for 17 tests. Significant,  $P < 0.05$  (solid lines), non-significant (dashed lines).  
595 The x-axis shows the number of clusters at the focal percent-identity level ( $d_i$ ), and the y-  
596 axis is the mean of the clusters at the rank above ( $d_{i+1}/d_i$ ).  
597

598 **Figure 4 supplement 1. Resident genera of environment clusters.** Results from  
599 indicator species analysis illustrated as a heatmap. Only the 25 resident genera with the  
600 highest indval indices and  $P < 0.05$  (permutation test) are shown for every environment  
601 cluster (animal-associated, non-saline and saline free). For the full results see  
602 **Supplementary Data file 5.**  
603  
604  
605

#### 606 **Supplementary File legends**

607  
608 **File 1. Full GLMM outputs for the EMP data.**  
609

610 **File 2. Goodness of fit for the GLMMs.**  
611

612 **File 3. Full GLMM output for simulated data under Neutral Theory models**  
613

614 **File 4. Full GLMM output for soil data (Delgado et al.)**  
615

616 **File 5. Indicator species analysis.** The table shows the assignment of each genus to one  
617 of three environment types.  
618

619 **File 6. Genome size assignment.** The table shows genome sizes assigned to each genus.  
620

621 **Materials and Methods**

622 **Earth Microbiome Project dataset.** We used the EMP ‘2000 subset’ of 16S rRNA gene  
623 sequences, rarefied to 5000 sequences per sample. This subset contains 155,002 ASVs  
624 from 2,000 samples with an even distribution across 17 natural environments (EMP  
625 Ontology level 3). Data were downloaded from the EMP FTP server ([ftp.microbio.me](ftp://ftp.microbio.me)),  
626 on February 9, 2018.

627

628 Specifically, 16S rRNA-V4 region reads (90 bp, GreenGenes 13.8 taxonomy) along with  
629 environmental data and EMPO3 designations

630 (<http://press.igsb.anl.gov/earthmicrobiome/protocols-and-standards/emp/>) were

631 downloaded from the EMP FTP server ([ftp.microbio.me](ftp://ftp.microbio.me)), on February 9, 2018. Sequence  
632 summaries were downloaded from :

633 [ftp://ftp.microbio.me/emp/release1/otu\\_distributions/otu\\_summary.emp\\_deblur\\_90bp.sub](ftp://ftp.microbio.me/emp/release1/otu_distributions/otu_summary.emp_deblur_90bp.sub)  
634 [set\\_2k.rare\\_5000.tsv](ftp://ftp.microbio.me/emp/release1/otu_distributions/otu_summary.emp_deblur_90bp.sub), environmental data from:

635 [ftp://ftp.microbio.me/emp/release1/mapping\\_files/emp\\_qiime\\_mapping\\_release1.tsv](ftp://ftp.microbio.me/emp/release1/mapping_files/emp_qiime_mapping_release1.tsv), and  
636 EMPO3 designations from :

637 [ftp://ftp.microbio.me/emp/release1/mapping\\_files/emp\\_qiime\\_mapping\\_subset\\_2k.tsv](ftp://ftp.microbio.me/emp/release1/mapping_files/emp_qiime_mapping_subset_2k.tsv).

638 The list of the associated 97 studies and 61 corresponding principal investigator identities  
639 were downloaded from <https://www.nature.com/articles/nature24621#s1>.

640 Based on the ASV annotations across samples, we estimated the taxonomic ratio for each  
641 focal lineage (ASV:Genus, Genus:Family, Family:Order, Order:Class and Class:Phylum),  
642 along with the number of non-focal lineages (`dbd_analys_input.py`,



643 glmm\_analys\_input.py, Python Version 2.7). Unclassified ASVs were removed from the  
644 analyses.

645

646 **Generalized linear mixed model (GLMM) analyses.** We used GLMMs to determine  
647 how focal lineage diversity (*e.g.* its ASV:Genus ratio) is affected by community diversity  
648 (*e.g.* non-focal genera). The effects of environment (as defined by the EMP Ontology  
649 ‘level 3 biomes’) and the focal lineage identity were included as random effects on the  
650 slope and intercept. We also controlled for the submitting laboratory (identified by the  
651 principal investigator) and the EMP unique sample identifier (*i.e.* if two taxa were part of  
652 the same sample).

653 All models were fitted in Rstudio (Version 1.1.442, R Version 3.5.2) using the  
654 glmer function of the lme4 package (Bates et al., 2015). Data standardization  
655 (transformation to a mean of zero and a standard deviation of one) was applied to all  
656 predictors to get comparable estimates. In models with only one predictor, applying  
657 standardization resolved convergence warnings and considerably sped up the  
658 optimization. We first tested the significance of random effects, by using likelihood-ratio  
659 tests (LRTs, implemented in the anova function in the R stats package) on nested models  
660 where each random effect was dropped one at a time. We then assessed the significance  
661 of fixed effects using drop1 function from stats package with the likelihood-ratio test  
662 option (this function drops individual terms from the full model and compares models  
663 based on the AIC). We calculated the Akaike information criterion (AIC) of each  
664 significant model and a null model including all random effects but no fixed effects other  
665 than the intercept. We then report the difference in AIC between the full and null models

666 ( $\Delta$ AIC), along with a likelihood ratio test  $p$ -value to assess the significance of the full  
667 model relative to the null. Only significant models ( $P < 0.05$ ) are reported.

668         As an additional test of the goodness of fit for the significant models, we  
669 estimated the coefficient of determination ( $R^2$ ) using the `r.squaredGLMM` function from  
670 the MuMIn R package. This function implements a method developed by Nakagawa and  
671 Schielzeth and its extension for random slopes (Johnson, 2014; Nakagawa & Schielzeth,  
672 2013). Two values were estimated: the marginal  $R^2$ , as a measure of the variance  
673 explained only by fixed effects, and the conditional  $R^2$  as a measure of the variance  
674 explained by the entire model (both fixed effects and random effects). Only results from  
675  $R^2$  estimation based on lognormal and trigamma methods were reported because they are  
676 specific to the logarithmic link function used in all GLMMs.

677         Diagnostic plots (`plot` and `qqnorm` R functions in base and stats packages) were  
678 checked for each model to ensure that residual homoscedasticity (homogeneity of  
679 variance) was fulfilled: no increase of the variance with fitted values and residuals were  
680 symmetrically distributed tending to cluster around the 0 of the ordinate, but with an  
681 expected pattern due to count data. Normality plots were imperfect, but they generally  
682 showed that the residuals were close to being normally distributed. The assumption of  
683 normality is often difficult to fulfill with high numbers of observations, as is the case in  
684 our models (<https://www.statisticshowto.datasciencecentral.com/shapiro-wilk-test/>), and  
685 non-normality is less of concern than heteroscedastic for the validity of GLMMs  
686 ([https://bbolker.github.io/mixedmodels-misc/ecostats\\_chap.html#diagnostics](https://bbolker.github.io/mixedmodels-misc/ecostats_chap.html#diagnostics)).

687         We tested for overdispersion using the `overdisp_fun` R function available at  
688 <https://bbolker.github.io/mixedmodels-misc/glmmFAQ.html>, and found that all the

689 models were not overdispersed, but rather were underdispersed : the ratio of the sum of  
690 squared Pearson residuals to residual degrees of freedom was  $< 1$  and non-significant  
691 when tested with a chi-squared test. The only exception was Shannon diversity-based  
692 GLMMs. In case of underdispersion and given that underdispersion leads to more  
693 conservative results, we retained the GLMMs with Poisson error distribution, despite the  
694 underdispersion. (GLMM FAQ; Ben Bolker and others; 25 September 2018;  
695 <https://bbolker.github.io/mixedmodels-misc/glmmFAQ.html#underdispersion>). For  
696 Shannon diversity-based GLMMs, we accounted for overdispersion by adding an  
697 observation-level random effect to the GLMMs (Elston et al., 2001).

698

### 699 **Taxonomy-based GLMMs**

700 To test how focal lineage diversity (*e.g.* its ASV:Genus ratio) is affected by community  
701 diversity (*e.g.* non-focal genera richness), for different environment types and lineages  
702 across all taxonomic ratios, we used generalized linear mixed models (GLMMs) fitted on  
703 the EMP dataset. As the dependent variable (focal lineage diversity, defined as taxonomic  
704 ratios, ASV:Genus, Genus:Family, Family:Order, Order:Class, and Class:Phylum) was a  
705 count response, we used a Poisson error distribution with a log link function. Community  
706 diversity (number of non-focal lineages: non-focal Genera, Families, Orders, Classes, and  
707 Phyla), standardized to a mean of zero and a standard deviation of one, was specified as  
708 the predictor (fixed effect). We included the following random effects on the slope and  
709 intercept: lineage (Lin), environment (Env), environment nested within lineage (a lineage  
710 may be present in different environments) and lab (the principal investigator who  
711 conducted the EMP study) nested within environment (different labs sampled and

712 sequenced a given environment) (as suggested in <http://bbolker.github.io/mixedmodels->  
713 [misc/glmmFAQ.html](http://bbolker.github.io/mixedmodels-misc/glmmFAQ.html)). Defining random effects on the slope enabled us to test slope  
714 variation across groups of each categorical variable (*e.g.* slope variation between different  
715 environments or different lineages). We included the EMP unique sample ID as a random  
716 effect to control for dependencies between observations (if two taxa were part of the  
717 same sample) (**Table 1, Supplementary file 1 section 1**).

718

### 719 **Shannon diversity-based GLMMs**

720 We also tested whether ASV diversity in a focal taxon is dependent on the diversity of all  
721 other ASVs in that sample (rather than the diversity at only the focal taxonomic level, as  
722 in the taxonomy-based GLMMs above). We used the Shannon diversity index, which is  
723 robust to differences in sampling effort, and generally reaches a plateau at 5,000  
724 sequences or fewer (48, 49). To do so, we fitted a GLMM with the number of ASVs per  
725 focal taxon as the response variable, and the Shannon diversity based on ASVs across all  
726 non-focal taxa (*z*-standardized) as the predictor (fixed effect), the random effects were  
727 kept as in the taxonomy-based GLMMs, but we added an observation-level random effect  
728 to account for overdispersion (**Table 3, Supplementary file 1 section 2**). To avoid  
729 dependence between the response and predictor variables, we used the rarefied ASV  
730 dataset (5,000 ASVs/sample as above) as the response variable, and the Shannon  
731 diversity calculated on unrarefied data from the same samples as the predictor.

732

733 **Null models.** We considered three null models, all of which randomize the associations  
734 between ASVs within a sample, thus breaking any true biotic interactions. These null

735 models were randomly generated matrices of the same size as the real EMP dataset, but  
736 based on a distribution that arises from the Neutral Theory of Biodiversity. Neutral  
737 Theory postulates that the biodiversity of a metacommunity is governed by independent  
738 random population dynamics across species. The aggregate behaviour is quantified by the  
739 fundamental biodiversity number  $\theta$ , such that  $\theta = 2 J_M v$ , where  $J_M$  is the size of the  
740 metacommunity and  $v$  is the speciation rate. Parametrized by  $\theta$ , the metacommunity zero-  
741 sum multinomial distribution (mZSM) was developed to obtain random samples of size  $J$   
742 (Alonso & McKane, 2004). We used this mZSM distribution (implemented with the *sads*  
743 package in R; <http://search.r-project.org/library/sads/html/dmzsm.html>) to generate the  
744 counts of the ASVs for each dataset in models 1 and 2. Model 1 assumes that the whole  
745 dataset follows the same species abundance distribution (SAD), characterized by a  
746 mZSM with  $\theta = 50$ . Model 2 assumes that each environment has its own SAD and thus  
747 all the samples of a single environment are assigned the same  $\theta$  but are distinct across  
748 environments ( $\theta$  was chosen uniformly between 1 and 100). The number of samples per  
749 environment were the same as the EMP dataset. To obtain similar mean counts as the real  
750 dataset, we set  $J = 1000$  for both models 1 and 2, in order to vary  $\theta$  from 1 to 100. These  
751 values are reasonable based on previous studies that estimated these parameters from  
752 microbiome data (Li & Ma, 2016). We included a down-sampling step to replicate the  
753 zero-inflated nature of the real dataset (on average there were only 96 ASVs per sample  
754 while there was a total of 22,014 ASVs in the entire EMP dataset). To replicate the  
755 sampling effect due to rarefaction, we first created a vector of all individuals from a  
756 single sample. We then selected 5000 individuals at random whose identities determined  
757 which ASVs were found in that sample. These neutrally-derived random matrices, null

758 models 1 and 2, were plotted using the same plots (ASV:Genus vs number of genera) as  
759 the real EMP dataset and were then analyzed using GLMMs with community diversity as  
760 a predictor of focal lineage diversity (fixed effect), with lineage identity and EMP sample  
761 ID as random effects. For Model 1, the slope was significantly negative (GLMM, Wald  
762 test,  $z=-9.807$ ,  $P<2e-16$ ). For Model 2, the null GLMM (including the intercept only) was  
763 significant, meaning that the community diversity has no significant effect on focal  
764 lineages diversity (Likelihood-ratio test between the model with the predictor and the  
765 intercept-only model,  $P=0.9399$ ).

766 To generate a null model for a metacommunity assembled by niche processes,  
767 null model 3 was made by sampling from a single Poisson distribution ( $\lambda = 0.01$ ) for each  
768 element of the data matrix. We used the Poisson distribution as a sensitivity analysis  
769 compared to the ZSM, and found the two behave quite similarly (*i.e.* Model 1 and 3  
770 produce qualitatively similar results). The probability of size zero was sufficiently large  
771 that the down-sampling step was not needed for this model. Next, DBD and EC effects  
772 were added to null model 3 according to the following procedure. An element was chosen  
773 at random in a sample and tested if it is empty or full (*i.e.* checks the presence/absence of  
774 a particular ASV). If the element is full then the DBD algorithm fills an empty element  
775 chosen at random in the same sample, while the EC algorithm empties a filled element in  
776 the same sample. This is to mimic the effect of DBD creating a niche for a new ASV, or  
777 EC removing a niche based on the existing diversity. The strength of DBD or EC effects  
778 were determined by the percent of elements tested. These data were analyzed with  
779 GLMMs to test the power of our models to detect DBD or EC (**Table 2**, Supplementary  
780 Data file 3 Section 2.1).

781 **Rarefaction simulation**

782 We constructed a simple simulation in which each microbiome sample may differ in total  
783 diversity (*e.g.* in the observed range of genera) while maintaining a constant taxonomic  
784 ratio (*e.g.* ASV:genus ratio = 2). To mimic rarefaction, we then sampled a set number of  
785 sequencing reads from each synthetic community, assuming ASVs are sampled with  
786 equal probability and plotted the observed taxonomic ratio (**Fig. 2 supplement 9**). This  
787 simple simulation is implemented in `permute_ASVs_synthetic.pl`.

788

789 **Nucleotide sequence-based analysis.** We clustered ASVs at decreasing levels of  
790 nucleotide identity, from 100% identical ASVs down to 75% identity (roughly equivalent  
791 to phyla (Konstantinidis & Tiedje, 2005)). We estimated focal cluster diversity as the  
792 mean number of descendants per cluster (*e.g.* number of 100% clusters per 97% cluster)  
793 and plotted this against the total number of clusters (97% identity in this example). This  
794 approach has the advantage of including sequences even if they come from unnamed  
795 taxa. For each of the six nucleotide divergence ratios tested, the relationship between total  
796 number of clusters and focal cluster diversity was positive (**Fig. 2 supplement 10**),  
797 consistent with DBD and suggesting that the taxonomic analyses were qualitatively  
798 unbiased.

799 Fasta files with all ASVs per sample were produced by a python script  
800 (`Construct_fasta_per_sample.py`, Python Version 2.7) from the sequences summary file  
801 (`otu_summary.emp_deblur_90bp.subset_2k.rare_5000` from EMP ftp server). We  
802 clustered sequences from each sample using USEARCH V9.2 and estimated sample  
803 diversity as the total number of clusters at a given level (*e.g.* 97% identity) and focal

804 cluster diversity as the mean number of descendent clusters (*e.g.* number of 100%  
805 clusters per 97% cluster). To describe the putative DBD or EC relationships, we tested  
806 three models: linear, quadratic and cubic (lm function in R). Model comparisons were  
807 based on the adjusted  $R^2$  (**Figure 2 supplement 10**).

808 We note that diversity at level  $i$  ( $d_i$ ) and at level  $i+1$  ( $d_{i+1}/d_i$ ) are not independent  
809 in this analysis because  $d_{i+1}$  must be greater than or equal to  $d_i$ . To assess the effects of  
810 this non-independence on the results, we conducted permutation tests by randomizing the  
811 associations between  $d_i$  and  $d_{i+1}$ . Using 999 permutations,  $P$ -values were calculated based  
812 on how many times we observed a correlation greater than that seen in the real data  
813 (cor.test R function with kendall method). In each permutation, we recalculated the  
814 significance test (Wald z) for the correlation in the randomized data, and then computed  
815 the  $P$ -value based on how many times we observed a z value greater than that of the  
816 original data. At all six levels of nucleotide identity, the real data always showed a  
817 significantly stronger positive correlation when compared to permuted data ( $P = 0.001$ ),  
818 indicating that the DBD patterns was not an artefact of the dependence structure in the  
819 data.

820 The effect of community diversity on focal cluster diversity was also tested across  
821 different environments analyzed separately. We modelled this relationship with linear,  
822 quadratic and cubic fits, and compared those models based on the adjusted  $R^2$  (**Figure 2**  
823 **supplement 11**).

824

825 **DBD variation across environments**



826 We tested the variation of focal lineage diversity slopes across different environments by  
827 including EMPO 3 biome type as a fixed effect. We fitted a GLMM with the interaction  
828 between community diversity and environment type as a predictor of focal lineage  
829 diversity. All other random effects on intercept and slope were kept as in the previous  
830 GLMMs (**Figure 3, Supplementary Data file 1 Section 3**). DBD variation across  
831 environments was tested for Family:Order, Order:Class and Class:Phylum taxonomic  
832 ratios, as diversity slope variation by environment was statistically significant  
833 (likelihood-ratio test,  $P < 0.05$ ) for these ratios in the taxonomy based models (**Table 1**).

834

### 835 **Abiotic effects**

836 To test for the relative effect of biotic and abiotic environmental variables on focal  
837 lineage diversity across different taxonomic ratios, we used a separate GLMM, with  
838 Poisson error distribution and a log link function, for every ratio. We fitted the GLMM on  
839 a subset (~10%) of the whole dataset, 192 samples (from water: saline (19) and non-  
840 saline (44), surface: saline (42) and non-saline (19), sediment: saline (22) and non-saline  
841 (31), soil (8) and plant rhizosphere (7)), for which measurements of four key abiotic  
842 variables (temperature, pH, latitude and elevation) were available. As predictors of focal  
843 lineage diversity (fixed effects), we included non-focal community diversity and abiotic  
844 variables, as well as their interactions. All predictors were standardized to a mean of zero  
845 and a standard deviation of one to obtain comparable estimates. The GLMM had the  
846 same random effects as in the previous analysis, but only on the intercept for simplicity  
847 (**Table 4, Supplementary file 1 section 4**).

848

## 849 **Soil dataset analysis**

850 We used the Delgado-Baquerizo et al. 2018 soil microbiome survey (237 samples from  
851 18 countries) to further test the relative impacts of biotic versus abiotic drivers of  
852 diversity. Raw data and abiotic measurements were downloaded from Figshare  
853 (<https://figshare.com/s/82a2d3f5d38ace925492>; DOI: 10.6084/m9.figshare.5611321).  
854 16S bioinformatic processing was performed using QIIME2 and Deblur with the same  
855 protocol as in Thompson et al. 2017. Raw data 16S rRNA gene (V3-V4 region), were  
856 processed by trimming the primers (341F/805R primer set) with qiime cutadapt trim-  
857 paired, then merged using qiime vsearch join-pairs. Sequences were quality filtered and  
858 denoised using Deblur with a trimming length of 400bp. The resulting 400-bp Deblur  
859 BIOM table was filtered to keep only ASVs with at least 25 reads total over all samples  
860 and rarefied to a depth of 5000. Taxonomy was assigned with a Naive Bayes classifier  
861 trained on the V4-V3 region of 99% OTU Greengenes 13.8 sequences with qiime feature-  
862 classifier. We obtained a final dataset of 186 samples and 24,252 ASVs which was used  
863 as input for all statistical analysis as in the EMP dataset analysis. This data set included  
864 14 environmental factors: aridity index (Aridity\_Index), minimum and maximum  
865 temperature (MINT and MAXT), precipitation seasonality (PSEA), mean diurnal  
866 temperature range (MDR), ultra-violet (UV) radiation (UV\_Light), net primary  
867 productivity (NPP2003\_2015), soil texture (Clay\_silt), pH; total C (Soil\_C), N (Soil\_N)  
868 and P (Soil\_P ) concentrations, C:N ratio (Soil\_C\_N\_ratio) and Latitude.  
869 We used a separate GLMM with Poisson error distribution and a log link function to test  
870 for the effect of biotic (non-focal community diversity) and abiotic environmental  
871 variables on focal lineage diversity (e.g. the ASV:Genus ratio for a focal genus), across

872 different taxonomic ratios. We defined non-focal taxa diversity and abiotic variables as  
873 predictors (fixed effects) and the lineage identity as a random effect.

874 We also fitted the same model but with the first three principal components (PCs) from the  
875 principal component analysis (PCA, rda function, vegan R package) of the abiotic variables  
876 (a matrix of 237 samples (rows) by 14 abiotic variables (columns)), as well as the  
877 interactions between diversity and each PC, and the interaction between PCs as predictors  
878 (fixed effects).

879 Because of possible non-linear relationships between abiotic variables and diversity,  
880 GLMMs were fitted with a linear and a quadratic term for every abiotic variable. The  
881 quadratic terms were not significant, except for the ASV:genus ratio (**Table 5**; likelihood-  
882 ratio test,  $P < 2.2e-16$ ). The interaction terms were not significant except the interaction  
883 between diversity and PCs at Family:Order ratio (likelihood-ratio test,  $P = 2.182e-05$ ;  
884 **Table 5, Supplementary file 4**).

885

886 **Defining residents, generalists, and migrants.** We defined a genus-level community  
887 composition matrix as a matrix of 1128 genera (rows) by 17 environments (columns),  
888 with the matrix entries indicating the percentage of samples from a given environment in  
889 which each genus is present. We clustered the environmental samples based on their  
890 genus-level community composition using fuzzy  $k$ -means clustering. The clustering  
891 (cmeans function, package e1071 in R) was done on the ‘hellinger’ transformed data  
892 (decostand function, vegan R package). To identify resident genera to each cluster, we  
893 used indicator species analysis (Dufrene & Legendre, 1997) as implemented in the indval

894 function (labdsv R package). We defined residents as genera with indval indices between  
895 0.4 and 0.9, with permutation test  $P < 0.05$ . Genera not associated with any cluster were  
896 considered generalists. We used principal component analysis (PCA) on the community  
897 composition matrix to visualize the clustering and the indicator genera (rda function,  
898 vegan R package) (**Figure 4**). We then ran a separate GLMM for each environmental  
899 cluster, with resident genus-level diversity (number of non-focal genera) as a predictor of  
900 focal genus diversity (ASV:Genus ratio) for resident, migrant (residents of one cluster  
901 found in a different cluster) and generalist genera. The fixed effect was specified as the  
902 interaction between diversity and a factor defining the genus-cluster association (with  
903 three levels: resident, migrant and generalist). Random effects on intercept and slope  
904 were kept as in the GLMMs described above.

905

906 **Genome size analysis.** We chose a subset of genera represented by one or more  
907 sequenced genomes in the NCBI microbial genomes database  
908 (<https://www.ncbi.nlm.nih.gov/genome/browse#!/prokaryotes/>). For these genera, a  
909 representative genome size was assigned by selecting the genome with the lowest number  
910 of scaffolds (if no closed genomes were available) (**Supplementary file 6**). If multiple  
911 genomes were available with the same level of completion, the largest genome size was  
912 used, as smaller genomes could be artefacts of incomplete assembly which would bias the  
913 mean and median downward. Moreover, given the deletional bias in bacterial genomes  
914 (Kuo & Ochman, 2009a), the largest genome is likely more reflective of the ancestral  
915 genome size of the genus. Only genera with two or more ASVs in at least one sample  
916 were included in the analysis. Intracellular symbionts were excluded. We fitted a GLMM

917 on the subset of data with known genome size (576 genera, ranging from ~1 to 15 Mbp)  
918 with the interaction between community diversity and genome size as a predictor of focal  
919 lineage diversity at the ASV:Genus level. All the other random effects on intercept and  
920 slope were kept as in the previous GLMMs (**Supplementary file 1 section 6**).  
921

## 922 References

- 923 Alonso, D., & McKane, A. J. (2004). Sampling Hubbell's neutral theory of biodiversity:  
924 Sampling neutral theory. *Ecology Letters*, 7(10), 901–910.  
925 <https://doi.org/10.1111/j.1461-0248.2004.00640.x>
- 926 Auguet, J.-C., Barberan, A., & Casamayor, E. O. (2010). Global ecological patterns in  
927 uncultured Archaea. *The ISME Journal*, 4(2), 182–190.  
928 <https://doi.org/10.1038/ismej.2009.109>
- 929 Azaele, S., Suweis, S., Grilli, J., Volkov, I., Banavar, J. R., & Maritan, A. (2016).  
930 Statistical mechanics of ecological systems: Neutral theory and beyond. *Reviews of*  
931 *Modern Physics*, 88(3), 035003. <https://doi.org/10.1103/RevModPhys.88.035003>
- 932 Bailey, S. F., Dettman, J. R., Rainey, P. B., & Kassen, R. (2013). Competition both drives  
933 and impedes diversification in a model adaptive radiation. *Proceedings. Biological*  
934 *Sciences / The Royal Society*, 280(1766), 20131253.  
935 <https://doi.org/10.1098/rspb.2013.1253>
- 936 Barberán, A., Ramirez, K. S., Leff, J. W., Bradford, M. a., Wall, D. H., & Fierer, N.  
937 (2014). Why are some microbes more ubiquitous than others? Predicting the habitat  
938 breadth of soil bacteria. *Ecology Letters*, 17(7), 794–802.  
939 <https://doi.org/10.1111/ele.12282>
- 940 Bates, D., Mächler, M., Bolker, B., & Walker, S. (2015). Fitting Linear Mixed-Effects  
941 Models Using lme4. *Journal of Statistical Software*, 67(1), 1–48.  
942 <https://doi.org/10.18637/jss.v067.i01>
- 943 Brockhurst, M. A., Buckling, A., & Rainey, P. B. (2005). The effect of a bacteriophage  
944 on diversification of the opportunistic bacterial pathogen, *Pseudomonas aeruginosa*.

- 945 *Proceedings. Biological Sciences / The Royal Society*, 272(1570), 1385–1391.
- 946 <https://doi.org/10.1098/rspb.2005.3086>
- 947 Brockhurst, M. A., Colegrave, N., Hodgson, D. J., & Buckling, A. (2007). Niche  
948 occupation limits adaptive radiation in experimental microcosms. *PloS One*, 2(2),  
949 e193. <https://doi.org/10.1371/journal.pone.0000193>
- 950 Calcagno, V., Jarne, P., Loreau, M., Mouquet, N., & David, P. (2017). Diversity spurs  
951 diversification in ecological communities. *Nature Communications*, 8, 15810.  
952 <https://doi.org/10.1038/ncomms15810>
- 953 Coyte, K. Z., Schluter, J., & Foster, K. R. (2015). The ecology of the microbiome:  
954 Networks, competition, and stability. *Science*, 350(6261), 663–666.  
955 <https://doi.org/10.1126/science.aad2602>
- 956 Czárán, T. L., Hoekstra, R. F., & Pagie, L. (2002). Chemical warfare between microbes  
957 promotes biodiversity. *Proceedings of the National Academy of Sciences of the*  
958 *United States of America*, 99(2), 786–790. <https://doi.org/10.1073/pnas.012399899>
- 959 Delgado-Baquerizo, M., Oliverio, A. M., Brewer, T. E., Benavent-González, A.,  
960 Eldridge, D. J., Bardgett, R. D., Maestre, F. T., Singh, B. K., & Fierer, N. (2018). A  
961 global atlas of the dominant bacteria found in soil. *Science*, 359(6373), 320–325.  
962 <https://doi.org/10.1126/science.aap9516>
- 963 de Wit, R., & Bouvier, T. (2006). “Everything is everywhere, but, the environment  
964 selects”; what did Baas Becking and Beijerinck really say? *Environmental*  
965 *Microbiology*, 8(4), 755–758. <https://doi.org/10.1111/j.1462-2920.2006.01017.x>
- 966 Dufrene, M., & Legendre, P. (1997). Species Assemblages and Indicator Species: The  
967 Need for a Flexible Asymmetrical Approach. *Ecological Monographs*, 67(3), 345–

- 968 366. <https://doi.org/10.2307/2963459>
- 969 Elston, D. A., Moss, R., Boulinier, T., Arrowsmith, C., & Lambin, X. (2001). Analysis of  
970 aggregation, a worked example: numbers of ticks on red grouse chicks.  
971 *Parasitology*, 122(Pt 5), 563–569. <https://doi.org/10.1017/s0031182001007740>
- 972 Elton, C. (1946). Competition and the Structure of Ecological Communities. *The Journal*  
973 *of Animal Ecology*, 15(1), 54–68. <https://doi.org/10.2307/1625>
- 974 Emerson, B. C., & Kolm, N. (2005). Species diversity can drive speciation. *Nature*,  
975 434(7036), 1015–1017. <https://doi.org/10.1038/nature03450>
- 976 Falkowski, P. G., Fenchel, T., & Delong, E. F. (2008). The microbial engines that drive  
977 Earth’s biogeochemical cycles. *Science*, 320(5879), 1034–1039.  
978 <https://doi.org/10.1126/science.1153213>
- 979 Gause, G. F. (2003). *The Struggle for Existence* (Williams & Wilkins, Baltimore, 1934).
- 980 Gómez, P., & Buckling, A. (2013). Real-time microbial adaptive diversification in soil.  
981 *Ecology Letters*, 16(5), 650–655. <https://doi.org/10.1111/ele.12093>
- 982 Gotelli, N. J., & Colwell, R. K. (2001). Quantifying biodiversity: procedures and pitfalls  
983 in the measurement and comparison of species richness. *Ecology Letters*, 4(4), 379–  
984 391. <https://doi.org/10.1046/j.1461-0248.2001.00230.x>
- 985 Gotelli, N. J., & McGill, B. J. (2006). Null Versus Neutral Models: What’s The  
986 Difference? *Ecography*, 29(5), 793–800. [https://doi.org/10.1111/j.2006.0906-](https://doi.org/10.1111/j.2006.0906-7590.04714.x)  
987 [7590.04714.x](https://doi.org/10.1111/j.2006.0906-7590.04714.x)
- 988 Harris, K., Parsons, T. L., Ijaz, U. Z., Lahti, L., Holmes, I., & Quince, C. (2017). Linking  
989 Statistical and Ecological Theory: Hubbell’s Unified Neutral Theory of Biodiversity  
990 as a Hierarchical Dirichlet Process. *Proceedings of the IEEE*, 105(3), 516–529.



- 991 <https://doi.org/10.1109/JPROC.2015.2428213>
- 992 Hibbing, M. E., Fuqua, C., Parsek, M. R., & Peterson, S. B. (2010). Bacterial  
993 competition: surviving and thriving in the microbial jungle. *Nature Reviews*  
994 *Microbiology*, 8(1), 15–25. <https://doi.org/10.1038/nrmicro2259>
- 995 Hubbell, S. P. (2001). *The Unified Neutral Theory of Biodiversity and Biogeography*.  
996 Princeton University Press.
- 997 Hug, L. A., Baker, B. J., Anantharaman, K., Brown, C. T., Probst, A. J., Castelle, C. J.,  
998 Butterfield, C. N., Hemsdorf, A. W., Amano, Y., Kotaro, I., Suzuki, Y., Dudek, N.,  
999 Relman, D. A., Finstad, K. M., Amundson, R., Thomas, B. C., & Banfield, J. F.  
1000 (2016). A new view of the tree and life’s diversity. *Nature Microbiology*, 1, 16048  
1001 <https://doi.org/10.1038/nmicrobiol.2016.48>
- 1002 Jarvinen, O. (1982). Species-To-Genus Ratios in Biogeography: A Historical Note.  
1003 *Journal of Biogeography*, 9(4), 363–370. <https://doi.org/10.2307/2844723>
- 1004 Johnson, P. C. (2014). Extension of Nakagawa & Schielzeth’s R<sup>2</sup>GLMM to random  
1005 slopes models. *Methods in Ecology and Evolution / British Ecological Society*, 5(9),  
1006 944–946. <https://doi.org/10.1111/2041-210X.12225>
- 1007 Jousset, A., Eisenhauer, N., Merker, M., Mouquet, N., & Scheu, S. (2016). High  
1008 functional diversity stimulates diversification in experimental microbial  
1009 communities. *Science Advances*, 2(6), e1600124.  
1010 <https://doi.org/10.1126/sciadv.1600124>
- 1011 Kastman, E. K., Kamelamela, N., Norville, J. W., Cosetta, C. M., Dutton, R. J., & Wolfe,  
1012 B. E. (2016). Biotic Interactions Shape the Ecological Distributions of  
1013 *Staphylococcus* Species. *mBio*, 7(5). <https://doi.org/10.1128/mBio.01157-16>

- 1014 Kennedy, A. C., & de Luna, L. Z. (2005). Rhizosphere. In D. Hillel (Ed.), *Encyclopedia*  
1015 *of Soils in the Environment* (pp. 399–406). Elsevier. <https://doi.org/10.1016/B0-12->  
1016 [348530-4/00163-6](https://doi.org/10.1016/B0-12-348530-4/00163-6)
- 1017 Konstantinidis, K. T., & Tiedje, J. M. (2005). Towards a genome-based taxonomy for  
1018 prokaryotes. *Journal of Bacteriology*, *187*(18), 6258–6264.
- 1019 Kuo, C.-H., & Ochman, H. (2009a). Deletional bias across the three domains of life.  
1020 *Genome Biology and Evolution*, *1*, 145–152. <https://doi.org/10.1093/gbe/evp016>
- 1021 Kuo, C.-H., & Ochman, H. (2009b). Inferring clocks when lacking rocks: the variable  
1022 rates of molecular evolution in bacteria. *Biology Direct*, *4*, 35.  
1023 <https://doi.org/10.1186/1745-6150-4-35>
- 1024 Laland, K. N., Odling-Smee, F. J., & Feldman, M. W. (1999). Evolutionary consequences  
1025 of niche construction and their implications for ecology. *Proceedings of the National*  
1026 *Academy of Sciences of the United States of America*, *96*(18), 10242–10247.  
1027 <https://doi.org/10.1073/pnas.96.18.10242>
- 1028 Lapierre, P., & Gogarten, J. P. (2009). Estimating the size of the bacterial pan-genome.  
1029 *Trends in Genetics: TIG*, *25*(3), 107–110. <https://doi.org/10.1016/j.tig.2008.12.004>
- 1030 Lauber, C. L., Hamady, M., Knight, R., & Fierer, N. (2009). Soil pH as a predictor of soil  
1031 bacterial community structure at the continental scale: a pyrosequencing-based  
1032 assessment. *Applied and Environmental Microbiology*. *75*, 5111-5120.  
1033 <http://aem.asm.org/content/early/2009/06/05/AEM.00335-09.short>
- 1034 Li, L., & Ma, Z. S. (2016). Testing the Neutral Theory of Biodiversity with Human  
1035 Microbiome Datasets. *Scientific Reports*, *6*, 31448.  
1036 <https://doi.org/10.1038/srep31448>

- 1037 Lindow, S. E., & Brandl, M. T. (2003). Microbiology of the phyllosphere. *Applied and*  
1038 *Environmental Microbiology*, 69(4), 1875–1883.  
1039 <https://doi.org/10.1128/aem.69.4.1875-1883.2003>
- 1040 Louca, S., Mazel, F., Doebeli, M., & Parfrey, L. W. (2019). A census-based estimate of  
1041 Earth’s bacterial and archaeal diversity. *PLoS Biology*, 17(2), e3000106.  
1042 <https://doi.org/10.1371/journal.pbio.3000106>
- 1043 Louca, S., & Pennell, M. W. (2020). Extant timetrees are consistent with a myriad of  
1044 diversification histories. *Nature*, 580(7804), 502–505.  
1045 <https://doi.org/10.1038/s41586-020-2176-1>
- 1046 Louca, S., Shih, P. M., Pennell, M. W., Fischer, W. W., Parfrey, L. W., & Doebeli, M.  
1047 (2018). Bacterial diversification through geological time. *Nature Ecology &*  
1048 *Evolution*, 2(9), 1458–1467. <https://doi.org/10.1038/s41559-018-0625-0>
- 1049 Lozupone, C. A., & Knight, R. (2007). Global patterns in bacterial diversity. *Proceedings*  
1050 *of the National Academy of Sciences of the United States of America*, 104(27),  
1051 11436–11440. <https://doi.org/10.1073/pnas.0611525104>
- 1052 Marshall, C. R. (2017). Five palaeobiological laws needed to understand the evolution of  
1053 the living biota. *Nature Ecology & Evolution*, 1(6), 165.  
1054 <https://doi.org/10.1038/s41559-017-0165>
- 1055 Meyer, J. R., & Kassen, R. (2007). The effects of competition and predation on  
1056 diversification in a model adaptive radiation. *Nature*, 446(7134), 432–435.  
1057 <http://www.nature.com/doi/10.1038/nature05599>
- 1058 Morris, J. J., & Lenski, R. E. (2012). The Black Queen Hypothesis: evolution of  
1059 dependencies through adaptive gene loss. *mBio*. 3, e00036-12

- 1060 <http://mbio.asm.org/content/3/2/e00036-12.short>
- 1061 Nakagawa, S., & Schielzeth, H. (2013). A general and simple method for obtaining R<sup>2</sup>  
1062 from generalized linear mixed-effects models. *Methods in Ecology and Evolution* /  
1063 *British Ecological Society*, 4(2), 133–142. [https://doi.org/10.1111/j.2041-](https://doi.org/10.1111/j.2041-210x.2012.00261.x)  
1064 [210x.2012.00261.x](https://doi.org/10.1111/j.2041-210x.2012.00261.x)
- 1065 Needham, D. M., & Fuhrman, J. A. (2016). Pronounced daily succession of  
1066 phytoplankton, archaea and bacteria following a spring bloom. *Nature*  
1067 *Microbiology*, 1, 16005. <https://doi.org/10.1038/NMICROBIOL.2016.5>
- 1068 Palmer, M. W., & Maurer, T. A. (1997). Does Diversity Beget Diversity? A Case Study  
1069 of Crops and Weeds. *Journal of Vegetation Science*, 8(2), 235–240.  
1070 <https://doi.org/10.2307/3237352>
- 1071 Parks, D. H., Chuvochina, M., Waite, D. W., Rinke, C., Skarshewski, A., Chaumeil, P.-  
1072 A., & Hugenholtz, P. (2018). A standardized bacterial taxonomy based on genome  
1073 phylogeny substantially revises the tree of life. *Nature Biotechnology*, 36(10), 996–  
1074 1004. <https://doi.org/10.1038/nbt.4229>
- 1075 Pennekamp, F., Pontarp, M., Tabi, A., Altermatt, F., Alther, R., Choffat, Y., Fronhofer, E.  
1076 A., Ganesanandamoorthy, P., Garnier, A., Griffiths, J. I., Greene, S., Horgan, K.,  
1077 Massie, T. M., Mächler, E., Palamara, G. M., Seymour, M., & Petchey, O. L.  
1078 (2018). Biodiversity increases and decreases ecosystem stability. *Nature*, 563(7729),  
1079 109–112. <https://doi.org/10.1038/s41586-018-0627-8>
- 1080 Power, J. F., Carere, C. R., Lee, C. K., Wakerley, G. L. J., Evans, D. W., Button, M.,  
1081 White, D., Climo, M. D., Hinze, A. M., Morgan, X. C., McDonald, I. R., Cary, S.  
1082 C., & Stott, M. B. (2018). Microbial biogeography of 925 geothermal springs in

- 1083 New Zealand. *Nature Communications*, 9(1), 2876. [https://doi.org/10.1038/s41467-](https://doi.org/10.1038/s41467-018-05020-y)
- 1084 018-05020-y
- 1085 Price, T. D., Hooper, D. M., Buchanan, C. D., Johansson, U. S., Tietze, D. T., Alström,
- 1086 P., Olsson, U., Ghosh-Harihar, M., Ishtiaq, F., Gupta, S. K., Martens, J., Harr, B.,
- 1087 Singh, P., & Mohan, D. (2014). Niche filling slows the diversification of Himalayan
- 1088 songbirds. *Nature*. 509, 222-225 <https://doi.org/10.1038/nature13272>
- 1089 Rabosky, D. L., Chang, J., Title, P. O., Cowman, P. F., Sallan, L., Friedman, M.,
- 1090 Kaschner, K., Garilao, C., Near, T. J., Coll, M., & Alfaro, M. E. (2018). An inverse
- 1091 latitudinal gradient in speciation rate for marine fishes. *Nature*, 559(7714), 392–395.
- 1092 <https://doi.org/10.1038/s41586-018-0273-1>
- 1093 Rabosky, D. L., & Hurlbert, A. H. (2015). Species richness at continental scales is
- 1094 dominated by ecological limits. *The American Naturalist*, 185(5), 572–583.
- 1095 <https://doi.org/10.1086/680850>
- 1096 San Roman, M., & Wagner, A. (2018). An enormous potential for niche construction
- 1097 through bacterial cross-feeding in a homogeneous environment. *PLoS*
- 1098 *Computational Biology*, 14(7), e1006340.
- 1099 <https://doi.org/10.1371/journal.pcbi.1006340>
- 1100 Schluter, D., & Pennell, M. W. (2017). Speciation gradients and the distribution of
- 1101 biodiversity. *Nature*, 546(7656), 48–55. <https://doi.org/10.1038/nature22897>
- 1102 Sender, R., Fuchs, S., & Milo, R. (2016). Revised Estimates for the Number of Human
- 1103 and Bacteria Cells in the Body. *PLoS Biology*, 14(8), e1002533.
- 1104 <https://doi.org/10.1371/journal.pbio.1002533>
- 1105 Seth, E. C., & Taga, M. E. (2014). Nutrient cross-feeding in the microbial world.

- 1106 *Frontiers in Microbiology*, 5, 350. <https://doi.org/10.3389/fmicb.2014.00350>
- 1107 Sogin, M. L., Morrison, H. G., Huber, J. A., Welch, D. M., Huse, S. M., Neal, P. R.,  
1108 Arrieta, J. M., & Herndl, G. J. (2006). Microbial diversity in the deep sea and the  
1109 underexplored “rare biosphere.” *Proceedings of the National Academy of Sciences of*  
1110 *the United States of America*, 103(32), 12115–12120.
- 1111 Sriswasdi, S., Yang, C.-C., & Iwasaki, W. (2017). Generalist species drive microbial  
1112 dispersion and evolution. *Nature Communications*, 8(1), 1162.  
1113 <https://doi.org/10.1038/s41467-017-01265-1>
- 1114 Sunagawa, S., Coelho, L. P., Chaffron, S., Kultima, J. R., Labadie, K., Salazar, G.,  
1115 Djahanschiri, B., Zeller, G., Mende, D. R., Alberti, A., Cornejo-Castillo, F. M.,  
1116 Costea, P. I., Cruaud, C., d’Ovidio, F., Engelen, S., Ferrera, I., Gasol, J. M., Guidi,  
1117 L., Hildebrand, F., ... Bork, P. (2015). Ocean plankton. Structure and function of the  
1118 global ocean microbiome. *Science*, 348(6237), 1261359.  
1119 <https://doi.org/10.1126/science.1261359>
- 1120 Thompson, L. R., Sanders, J. G., McDonald, D., Amir, A., Ladau, J., Locey, K. J., Prill,  
1121 R. J., Tripathi, A., Gibbons, S. M., Ackermann, G., Navas-Molina, J. A., Janssen, S.,  
1122 Kopylova, E., Vázquez-Baeza, Y., González, A., Morton, J. T., Mirarab, S., Xu, Z.  
1123 Z., Jiang, L., ... Zhao, H. (2017). A communal catalogue reveals Earth’s multiscale  
1124 microbial diversity. *Nature*, 551, 457-463. <https://doi.org/10.1038/nature24621>
- 1125 Vos, M. (2011). A species concept for bacteria based on adaptive divergence. *Trends in*  
1126 *Microbiology*, 19(1), 1–7. <https://doi.org/10.1016/j.tim.2010.10.003>
- 1127 Whitman, W. B., Coleman, D. C., & Wiebe, W. J. (1998). Prokaryotes: the unseen  
1128 majority. *Proceedings of the National Academy of Sciences of the United States of*

- 1129        *America*, 95(12), 6578–6583. <https://doi.org/10.1073/pnas.95.12.6578>
- 1130        Whittaker, R. H. (1972). Evolution and Measurement of Species Diversity. *Taxon*,
- 1131        21(2/3), 213–251. <https://doi.org/10.2307/1218190>
